# Supplementary material for: Iridium Complexes with BIAN-Type Ligands: Synthesis, Structure and Redox Chemistry
Source: MDPI journal article supplement (doi:10.3390/ijms241310457), 2023-06-21
Supplement: s1 [file s1]

# Supplementary Materials for

## Iridium complexes with BIAN-type ligand: synthesis, structure and redox chemistry

Nikolai F. Romashev <sup>1</sup>, Ivan V. Bakaev <sup>1,2</sup>, Veronika I. Komlyagina <sup>1,2</sup>, Pavel A. Abramov <sup>1,3</sup>, Irina V. Mirzaeva <sup>1</sup>, Vladimir A. Nadolinny <sup>1</sup>, Alexander N. Lavrov <sup>1</sup>, Nikolai B. Kompan'kov <sup>1</sup>, Artem A. Mikhailov <sup>4</sup>, Iakov S. Fomenko <sup>1</sup>, Alexander S. Novikov <sup>5,6,\*</sup>, Maxim N. Sokolov <sup>1</sup> and Artem L. Gushchin <sup>1,\*</sup>

<sup>1</sup> Nikolaev Institute of Inorganic Chemistry SB RAS, Novosibirsk 630090, Russia;

nikolaj.romashev75@gmail.com (N.F.R.); i.bakaev@g.nsu.ru (I.V.B.); v.komlyagina@g.nsu.ru (V.I.K.);

abramov@niic.nsc.ru (P.A.A.); daire@gmail.com (I.V.M.); spectr@niic.nsc.ru (V.A.N.);

lavrov@niic.nsc.ru (A.N.L.); nmr124@niic.nsc.ru (N.B.K.); fomenko@niic.nsc.ru (I.S.F.);

caesar@niic.nsc.ru (M.N.S.)

<sup>2</sup> Department of Natural Sciences, Novosibirsk State University, Novosibirsk 630090, Russia

<sup>3</sup> Research School of Chemistry and Applied Biomedical Sciences, Tomsk Polytechnic University, Tomsk 634034, Russia

<sup>4</sup> Laboratoire de Cristallographie, Résonance Magnétique et Modélisations, Université de Lorraine, CNRS, CRM2, UMR 7036, 54000 Nancy, France; amikhailov@niic.nsc.ru

<sup>5</sup> Institute of Chemistry, Saint Petersburg State University, Saint Petersburg 199034, Russia

<sup>6</sup> Research Institute of Chemistry, Peoples' Friendship University of Russia (RUDN University), Moscow 117198, Russia

\* Correspondence: a.s.novikov@spbu.ru (A.S.N.); gushchin@niic.nsc.ru (A.L.G.)

## Table of contents

**Table S1.** Crystal data and structure refinement for **1-3**.

**Table S2.** Selected geometric parameters (Å) for **1-3**.

**Table S3.** Comparison of selected calculated bond lengths (Å) and vibrational frequencies (cm<sup>-1</sup>) for [Ir(cod)(dpp-bian)Cl] (**1**) and [Rh(cod)(dpp-bian)Cl] [**1**].

**Table S4.** Comparison of metal and Cl natural electronic configurations and charges on ligands and on metal atoms for [Ir(cod)(dpp-bian)Cl] (**1**) and [Rh(cod)(dpp-bian)Cl] [**1**].

**Table S5.** Comparison of calculated characteristic bond lengths (Å) for cation of **2**

**Table S6.** Comparison of calculated characteristic vibrational frequencies (cm<sup>-1</sup>) for cation of **2**

**Table S7.** Topological properties of selected bond critical points for **1**: values of the electron density ( $\rho$ ), Laplacian of electron density ( $\nabla^2\rho$ ), positively defined kinetic energy density ( $G$ ), potential energy density ( $V$ ), total energy density ( $H$ ), metallicity [ $2$ ] ( $M$ ) and ellipticity ( $\text{elip}$ ). All values are given in atomic units.

**Table S8.** Topological properties of selected bond critical points in [Rh(cod)(dpp-bian)Cl] [**1**]: values of the electron density ( $\rho$ ), Laplacian of electron density ( $\nabla^2\rho$ ), positively defined kinetic energy density ( $G$ ), potential energy density ( $V$ ), total energy density ( $H$ ), metallicity [ $2$ ] ( $M$ ) and ellipticity ( $\text{elip}$ ). All values are given in atomic units.

**Table S9.** Ir natural electron configuration, charge and spin on Ir and ligands for cation of **2**.

**Table S10.** Topological properties of selected bond critical points for cation of **2**: values of the electron density ( $\rho$ ), Laplacian of electron density ( $\nabla^2\rho$ ), positively defined kinetic energy density ( $G$ ), potential energy density ( $V$ ), total energy density ( $H$ ), metallicity [ $2$ ] ( $M$ ) and ellipticity ( $\text{elip}$ ). All values are given in atomic units.

**Table S11.** Topological properties of selected bond critical points in for cation of **3**: values of the electron density ( $\rho$ ), Laplacian of electron density ( $\nabla^2\rho$ ), positively defined kinetic energy density ( $G$ ), potential energy density ( $V$ ), total energy density ( $H$ ), metallicity [ $2$ ] ( $M$ ) and ellipticity ( $\text{elip}$ ). All values are given in atomic units.

**Table S12.** Topological properties of selected bond critical points for cation of **4**: values of the electron density ( $\rho$ ), Laplacian of electron density ( $\nabla^2\rho$ ), positively defined kinetic energy density ( $G$ ), potential energy density ( $V$ ), total energy density ( $H$ ), metallicity [ $2$ ] ( $M$ ) and ellipticity ( $\text{elip}$ ). All values are given in atomic units.

**Table S13.** Cartesian atomic coordinates for model supramolecular associates used for theoretical analysis of intermolecular  $\pi$ - $\pi$  interactions in the crystal structures **2** and **3**.

**Table S14.** Values of the density of all electrons ( $\rho$ ), Laplacian of electron density ( $\nabla^2\rho$ ) and appropriate  $\lambda_2$  eigenvalues, energy density ( $H$ ), potential energy density ( $V$ ), positively defined

kinetic energy density (G), and electron localization function (ELF) at the bond critical points, corresponding to intermolecular C $\cdots$ C contacts in the crystal structures **2** and **3** (all values are given in atomic units) and their estimated strength ( $E_{\text{int}} = -V/2$ , in kcal/mol).

**Table S15.** Parameters of electrochemical experiments performed by cyclic voltammetry at different sweep rates for the first reduction process for complex **1**.

**Table S16.** Parameters of electrochemical experiments performed by cyclic voltammetry at different sweep rates for the oxidation process for complex **1**.

**Table S17.** Parameters of electrochemical experiments performed by cyclic voltammetry at different sweep rates for the first reduction process for complex **3**.

**Figure S1.** UV-vis spectra of **2** in CH<sub>2</sub>Cl<sub>2</sub> depending on time. Red line is the UV spectrum of **3** under the same conditions.

**Figure S2.** <sup>1</sup>H NMR spectrum of **1** in CDCl<sub>3</sub>.

**Figure S3.** <sup>1</sup>H NMR spectrum of **3** in CDCl<sub>3</sub>.

**Figure S4.** FT-IR spectrum for **1**.

**Figure S5.** FT-IR spectrum for **2**.

**Figure S6.** FT-IR spectrum for **3**.

**Figure S7.** ORTEP representation (50% probability ellipsoids) of **1**, cation of **2** and cation of **3**.

**Figure S8.**  $\pi$ - $\pi$  connected dimers in the crystal packing of **2**.

**Figure S9.**  $\pi$ - $\pi$  connected dimers in the crystal packing of **3**.

**Figure S10.** Crystal packing of **2**.

**Figure S11.** Crystal packing of **3**.

**Figure S12.** Contour line diagram of the Laplacian of electron density distribution, bond paths, and selected zero-flux surfaces (left panel), visualization of electron localization function (ELF, center panel) and reduced density gradient (RDG, right panel) analyses for selected intermolecular C $\cdots$ C contacts in the crystal structure **2**. Bond critical points are shown in blue, nuclear critical points – in pale brown, ring critical points – in orange, bond paths are shown as pale brown lines, length units – Å, and the color scale for the ELF and RDG maps is presented in atomic units.

**Figure S13.** Contour line diagram of the Laplacian of electron density distribution, bond paths, and selected zero-flux surfaces (left panel), visualization of electron localization function (ELF, center panel) and reduced density gradient (RDG, right panel) analyses for selected intermolecular C $\cdots$ C contacts in the crystal structure **3**. Bond critical points are shown in blue,

nuclear critical points – in pale brown, ring critical points – in orange, bond paths are shown as pale brown lines, length units – Å, and the color scale for the ELF and RDG maps is presented in atomic units.

**Figure S14.** CV of **3** in CH<sub>2</sub>Cl<sub>2</sub> in the -1.5–1.8 V region at potential scan rate of 100 mV/s (blue spectrum – reduction part, red spectrum – oxidation part).

**Figure S15.** CVs of **1** in CH<sub>2</sub>Cl<sub>2</sub> (oxidation process), recorded at various potential scan rates (50-200 mV/s).

**Figure S16.** Dependence of the cathodic current on the square root of the sweep rate for the oxidation process for **1**.

**Figure S17.** Dependence of the anodic current on the square root of the sweep rate for the oxidation process for **1**.

**Figure S18.** CVs of **1** in CH<sub>2</sub>Cl<sub>2</sub> (first reduction process), recorded at various potential scan rates (50-200 mV/s).

**Figure S19.** Dependence of the cathodic current on the square root of the sweep rate for the first reduction process for **1**.

**Figure S20.** Dependence of the anodic current on the square root of the sweep rate for the first reduction process for **1**.

**Figure S21.** CVs of **3** in CH<sub>2</sub>Cl<sub>2</sub> (first reduction process), recorded at various potential scan rates (50-200 mV/s).

**Figure S22.** Dependence of the cathodic current on the square root of the sweep rate for the first reduction process for **3**.

**Figure S23.** Dependence of the anodic current on the square root of the sweep rate for the first reduction process for **3**.

**Figure S24.** Dependence of the FT-IR spectrum of **2** on temperature.

**Figure S25.** Dependence of the diffuse reflectance spectrum of **2** on temperature.

**Figure S26.** Electronic energy levels for [Ir(cod)(dpp-bian)]<sup>2+</sup> (cation of **4**) and its fragments.

**Table S1.** Crystal data and structure refinement for **1-3**.

|                                                                                                                | <b>(1)</b>                                                                         | <b>(2)</b>                                                                                                                       | <b>(3)</b>                                                                                                                       |
|----------------------------------------------------------------------------------------------------------------|------------------------------------------------------------------------------------|----------------------------------------------------------------------------------------------------------------------------------|----------------------------------------------------------------------------------------------------------------------------------|
| Chemical formula                                                                                               | C <sub>44</sub> H <sub>52</sub> ClIrN <sub>2</sub>                                 | C <sub>44.40</sub> H <sub>52.80</sub> BCl <sub>0.80</sub> F <sub>4</sub> IrN <sub>3</sub> O                                      | C <sub>44</sub> H <sub>52</sub> BF <sub>4</sub> IrN <sub>2</sub>                                                                 |
| <i>M<sub>r</sub></i>                                                                                           | 836.52                                                                             | 951.86                                                                                                                           | 887.88                                                                                                                           |
| Crystal system, space group                                                                                    | Orthorhombic, <i>Pnma</i>                                                          | Monoclinic, <i>P2<sub>1</sub>/n</i>                                                                                              | Tetragonal, <i>P4<sub>2</sub>/mbc</i>                                                                                            |
| Temperature (K)                                                                                                | 150                                                                                | 86                                                                                                                               | 150                                                                                                                              |
| <i>a</i> , <i>b</i> , <i>c</i> (Å)                                                                             | 18.5911 (7), 19.4115 (8), 10.2299 (5)                                              | 11.2382 (18), 22.668 (3), 20.330 (3)                                                                                             | 20.1791 (4), 20.1791 (4), 19.1826 (5)                                                                                            |
| $\alpha$ , $\beta$ , $\gamma$ (°)                                                                              | 90, 90, 90                                                                         | 90, 97.427 (5), 90                                                                                                               | 90, 90, 90                                                                                                                       |
| <i>V</i> (Å <sup>3</sup> )                                                                                     | 3691.8 (3)                                                                         | 5135.7 (14)                                                                                                                      | 7811.1 (4)                                                                                                                       |
| <i>Z</i>                                                                                                       | 4                                                                                  | 4                                                                                                                                | 8                                                                                                                                |
| Radiation type                                                                                                 | Cu <i>Ka</i>                                                                       | Mo <i>Ka</i>                                                                                                                     | Mo <i>Ka</i>                                                                                                                     |
| $\mu$ (mm <sup>-1</sup> )                                                                                      | 7.91                                                                               | 2.69                                                                                                                             | 3.47                                                                                                                             |
| Crystal size (mm)                                                                                              | 0.06 × 0.04 × 0.02                                                                 | 0.12 × 0.12 × 0.07                                                                                                               | 0.18 × 0.14 × 0.11                                                                                                               |
| Diffractometer                                                                                                 | Bruker Apex Duo                                                                    | Bruker D8 Venture diffractometer                                                                                                 | Bruker D8 Venture diffractometer                                                                                                 |
| Absorption correction                                                                                          | Multi-scan <i>SADABS</i> (Bruker-AXS, 2004)                                        | Multi-scan <i>SADABS</i> 2016/2: Krause, L., Herbst-Irmer, R., Sheldrick G.M. & Stalke D., <i>J. Appl. Cryst.</i> 48 (2015) 3-10 | Multi-scan <i>SADABS</i> 2016/2: Krause, L., Herbst-Irmer, R., Sheldrick G.M. & Stalke D., <i>J. Appl. Cryst.</i> 48 (2015) 3-10 |
| <i>T<sub>min</sub></i> , <i>T<sub>max</sub></i>                                                                | 0.640, 0.753                                                                       | 0.602, 0.745                                                                                                                     | 0.600, 0.746                                                                                                                     |
| No. of measured, independent and observed [ <i>I</i> > 2σ( <i>I</i> )] reflections                             | 15939, 3454, 2936                                                                  | 32478, 7275, 4452                                                                                                                | 36785, 5035, 3453                                                                                                                |
| <i>R<sub>int</sub></i>                                                                                         | 0.039                                                                              | 0.164                                                                                                                            | 0.084                                                                                                                            |
| $\theta_{\max}$ (°)                                                                                            | 69.9                                                                               | 23.3                                                                                                                             | 28.7                                                                                                                             |
| (sin $\theta/\lambda$ ) <sub>max</sub> (Å <sup>-1</sup> )                                                      | 0.609                                                                              | 0.556                                                                                                                            | 0.676                                                                                                                            |
| Range of <i>h</i> , <i>k</i> , <i>l</i>                                                                        | -20 ≤ <i>h</i> ≤ 21,<br>-23 ≤ <i>k</i> ≤ 17,<br>-12 ≤ <i>l</i> ≤ 11                | -12 ≤ <i>h</i> ≤ 12,<br>-25 ≤ <i>k</i> ≤ 25,<br>-22 ≤ <i>l</i> ≤ 21                                                              | -24 ≤ <i>h</i> ≤ 25,<br>-25 ≤ <i>k</i> ≤ 24,<br>-22 ≤ <i>l</i> ≤ 25                                                              |
| <i>R</i> [ <i>F</i> <sup>2</sup> > 2σ( <i>F</i> <sup>2</sup> )], <i>wR</i> ( <i>F</i> <sup>2</sup> ), <i>S</i> | 0.032, 0.075, 1.04                                                                 | 0.071, 0.239, 0.79                                                                                                               | 0.041, 0.106, 1.01                                                                                                               |
| No. of reflections, parameters, restraints                                                                     | 3454, 227, 12                                                                      | 7275, 492, 12                                                                                                                    | 5035, 244, 18                                                                                                                    |
| Weighting scheme                                                                                               | $w = 1/[\sigma^2(F_o^2) + (0.031P)^2 + 7.9633P]$<br>where $P = (F_o^2 + 2F_c^2)/3$ | $w = 1/[\sigma^2(F_o^2) + (0.2P)^2]$<br>where $P = (F_o^2 + 2F_c^2)/3$                                                           | $w = 1/[\sigma^2(F_o^2) + (0.0552P)^2]$<br>where $P = (F_o^2 + 2F_c^2)/3$                                                        |
| $\Delta\rho_{\max}$ , $\Delta\rho_{\min}$ (e Å <sup>-3</sup> )                                                 | 1.33, -1.04                                                                        | 1.43, -1.49                                                                                                                      | 1.32, -1.27                                                                                                                      |

Computer programs: *APEX2* (Bruker-AXS, 2004), *APEX3* (Bruker-AXS, 2016), *SAINT* (Bruker-AXS, 2004), *SAINT* (Bruker-AXS, 2016), *SHELXS2014* (Sheldrick, 2014), *SHELXT* 2014/5 (Sheldrick, 2014), *SHELXL2014* (Sheldrick, 2014), *SHELXL2017/1* (Sheldrick, 2017), *ShelXle* (Hübschle, 2011), *CIFTAB-2014* (Sheldrick, 2014).

**Table S2.** Selected geometric parameters (Å) for **1-3**.

| (1)                   |             | (2)     |            | (3)    |           |
|-----------------------|-------------|---------|------------|--------|-----------|
| Ir1—N1 <sup>i</sup>   | 2.095 (3)   | N1B—Ir1 | 2.02 (3)   | N1—Ir1 | 2.095 (3) |
| Ir1—N1                | 2.095 (3)   | N1A—Ir1 | 1.91 (5)   | C5—N1  | 1.298 (5) |
| N1—C01                | 1.324 (5)   | N2—Ir1  | 2.115 (11) | C12—N1 | 1.452 (5) |
| N1—C11                | 1.448 (5)   | N3—Ir1  | 2.127 (10) | C2—Ir1 | 2.127 (5) |
| Ir1—C11               | 2.4751 (15) | C1—N3   | 1.296 (16) | C3—Ir1 | 2.127 (5) |
| Ir1—C112 <sup>i</sup> | 2.147 (5)   | C8—N2   | 1.302 (17) |        |           |
| Ir1—C112              | 2.147 (5)   | C21—N2  | 1.449 (17) |        |           |
| Ir1—C113 <sup>i</sup> | 2.121 (4)   | C32—N3  | 1.472 (17) |        |           |
| Ir1—C113              | 2.121 (4)   | C37—Ir1 | 2.181 (16) |        |           |
|                       |             | C40—Ir1 | 2.241 (16) |        |           |
|                       |             | C43—Ir1 | 2.235 (16) |        |           |
|                       |             | C44—Ir1 | 2.184 (15) |        |           |

Symmetry code(s): (i)  $x, -y+3/2, z$ .

**Table S3.** Comparison of selected calculated bond lengths (Å) and vibrational frequencies (cm<sup>-1</sup>) for [Ir(cod)(dpp-bian)Cl] (**1**) and [Rh(cod)(dpp-bian)Cl] [**1**].

|                                  | Ir/Rh-Cl | Ir/Rh-N         | C=C<br>(dpp-<br>bian) | C-N             | $\nu(\text{C}=\text{C})$<br>(dpp-<br>bian) | $\nu_{\text{asym}}(\text{C}-\text{N})$ | $\nu_{\text{sym}}(\text{C}-\text{N})$ |
|----------------------------------|----------|-----------------|-----------------------|-----------------|--------------------------------------------|----------------------------------------|---------------------------------------|
| [(dpp-bian)IrCl(cod)]<br>ground  | 2.497    | 2.103;<br>2.126 | 1.442                 | 1.322           | 1312                                       | 1545                                   | 1524                                  |
| [(dpp-bian)IrCl(cod)]<br>excited | 2.608    | 2.107           | 1.435                 | 1.336           | 1313                                       | 1468                                   | 1556                                  |
| [(dpp-bian)RhCl(cod)]            | 2.574    | 2.131;<br>2.144 | 1.455                 | 1.317;<br>1.318 | 1295                                       | 1549                                   | 1524                                  |

**Table S4.** Comparison of metal and Cl natural electronic configurations and charges on ligands and on metal atoms for [Ir(cod)(dpp-bian)Cl] (**1**) and [Rh(cod)(dpp-bian)Cl] [**1**].

|                             | [Ir(cod)(dpp-bian)Cl]                      |         | [Rh(cod)(dpp-bian)Cl]                               |         |
|-----------------------------|--------------------------------------------|---------|-----------------------------------------------------|---------|
| Ir/Rh Natural configuration | [core]6s( 0.35)5d( 7.76)6p( 0.01)6d( 0.02) |         | [core]5s( 0.22)4d( 8.03)5p( 0.01)5d( 0.02)6p( 0.01) |         |
| Cl Natural configuration    | [core]3s( 1.96)3p( 5.69)                   |         | [core]3s( 1.96)3p( 5.65)                            |         |
|                             | NPA                                        | AIM     | NPA                                                 | AIM     |
| Ir/Rh                       | 0.8503                                     | 0.8893  | 0.7141                                              | 0.7734  |
| Cl                          | -0.6574                                    | -0.5467 | -0.6163                                             | -0.6012 |
| dpp-bian                    | -0.2473                                    | -0.1866 | -0.2911                                             | -0.1324 |
| cod                         | 0.0544                                     | -0.1560 | 0.19329                                             | -0.0398 |

**Table S5.** Comparison of calculated characteristic bond lengths (Å) for cation of **2**

|                                                        | Ir-N<br>(NO)                    | <Ir-N-O                   | N=O                       | Ir-N<br>(dpp-bian) | C=C<br>(dpp-bian) | C-N             |
|--------------------------------------------------------|---------------------------------|---------------------------|---------------------------|--------------------|-------------------|-----------------|
| [(dpp-bian)<br>IrNO(cod)] <sup>2+</sup><br><b>exp.</b> | 1.914<br>(v1)/<br>2.019<br>(v2) | 127.0 (v1)/<br>123.8 (v2) | 1.247 (v1)/<br>1.096 (v2) | 2.127;<br>2.116    | 1.503             | 1.295;<br>1.301 |
| [(dpp-bian)<br>IrNO(cod)] <sup>2+</sup><br>ground -v1  | 1.987                           | 127.3                     | 1.167                     | 2.164/<br>2.131    | 1.508             | 1.303;<br>1.309 |
| [(dpp-bian)<br>IrNO(cod)] <sup>2+</sup><br>ground-v2   | 1.968                           | 129.9                     | 1.166                     | 2.122;<br>2.210    | 1.509             | 1.302;<br>1.312 |
| [(dpp-bian)<br>IrNO(cod)] <sup>2+</sup><br>excited-v1  | 2.018                           | 129.0                     | 1.172                     | 2.147;<br>2.086    | 1.437             | 1.343;<br>1.340 |
| [(dpp-bian)<br>IrNO(cod)] <sup>2+</sup><br>excited-v2  | 2.002                           | 131.5                     | 1.172                     | 2.077;<br>2.177    | 1.438             | 1.345;<br>1.337 |

**Table S6.** Comparison of calculated characteristic vibrational frequencies (cm<sup>-1</sup>) for cation of **2**

|                                                       | v(C=C)<br>(dpp-bian) | v <sub>asym</sub> (C-N) | v <sub>sym</sub> (C-N) | v(N=O) | v(<Ir-N-O) |
|-------------------------------------------------------|----------------------|-------------------------|------------------------|--------|------------|
| [(dpp-bian)<br>IrNO(cod)] <sup>2+</sup><br>ground -v1 | 1289                 | 1580                    | 1557                   | 1743   | 521        |
| [(dpp-bian)<br>IrNO(cod)] <sup>2+</sup><br>ground-v2  | 1288                 | 1580                    | 1545                   | 1755   | 525        |
| [(dpp-bian)<br>IrNO(cod)] <sup>2+</sup><br>excited-v1 | 1423                 | 1438                    | 1474                   | 1718   | 478        |
| [(dpp-bian)<br>IrNO(cod)] <sup>2+</sup><br>excited-v2 | 1424                 | 1440                    | 1474                   | 1719   | 480        |



**Table S7.** Topological properties of selected bond critical points for **1**: values of the electron density ( $\rho$ ), Laplacian of electron density ( $\nabla^2\rho$ ), positively defined kinetic energy density ( $G$ ), potential energy density ( $V$ ), total energy density ( $H$ ), metallicity [ $2|H|$ ] ( $M$ ) and ellipticity ( $\text{elip}$ ). All values are given in atomic units.

| BOND           | $\rho$ | $\nabla^2\rho$ | $V$     | $G$    | $H$     | $M$      | $\text{elip}$ |
|----------------|--------|----------------|---------|--------|---------|----------|---------------|
| Ir-N           | 0.1037 | 0.3726         | -0.1624 | 0.1278 | -0.0346 | 4.2310   | 0.0905        |
| Ir-N           | 0.0989 | 0.3438         | -0.1501 | 0.1180 | -0.0321 | 4.2376   | 0.0538        |
| Ir-C           | 0.1085 | 0.1455         | -0.1539 | 0.0951 | -0.0588 | 11.6918  | 0.3038        |
| Ir-C           | 0.1116 | 0.1438         | -0.1606 | 0.0983 | -0.0623 | 12.4035  | 0.1462        |
| Ir-C           | 0.1124 | 0.1384         | -0.1618 | 0.0982 | -0.0636 | 13.0287  | 0.2624        |
| Ir-C           | 0.1107 | 0.1543         | -0.1593 | 0.0989 | -0.0604 | 11.3924  | 0.1758        |
| C=C (cod)      | 0.2837 | -0.6646        | -0.6479 | 0.2409 | -0.4071 | -12.6983 | 0.2023        |
| C=C (cod)      | 0.2808 | -0.6494        | -0.6373 | 0.2375 | -0.3998 | -12.7765 | 0.2038        |
| C=C (dpp-bian) | 0.2868 | -0.7173        | -0.6566 | 0.2387 | -0.4180 | -11.9849 | 0.1805        |
| C-N            | 0.3428 | -0.9589        | -0.8843 | 0.3223 | -0.5620 | -12.0672 | 0.2301        |
| C-N            | 0.3423 | -0.9543        | -0.8823 | 0.3219 | -0.5604 | -12.0946 | 0.2321        |
| Ir-Cl          | 0.0689 | 0.1559         | -0.0795 | 0.0592 | -0.0203 | 5.1212   | 0.0423        |

**Table S8.** Topological properties of selected bond critical points in [Rh(cod)(dpp-bian)Cl] [1]: values of the electron density ( $\rho$ ), Laplacian of electron density ( $\nabla^2\rho$ ), positively defined kinetic energy density ( $G$ ), potential energy density ( $V$ ), total energy density ( $H$ ), metallicity [2] ( $M$ ) and ellipticity ( $\epsilon$ ). All values are given in atomic units.

| BOND           | $\rho$ | $\nabla^2\rho$ | $V$     | $G$    | $H$     | $M$      | $\epsilon$ |
|----------------|--------|----------------|---------|--------|---------|----------|------------|
| Rh-N           | 0.0850 | 0.3305         | -0.1219 | 0.1023 | -0.0196 | 3.4253   | 0.0601     |
| Rh-N           | 0.0874 | 0.3498         | -0.1280 | 0.1077 | -0.0203 | 3.3906   | 0.0759     |
| Rh-C           | 0.0987 | 0.1707         | -0.1353 | 0.0890 | -0.0463 | 8.5164   | 0.4625     |
| Rh-C           | 0.0976 | 0.1789         | -0.1337 | 0.0892 | -0.0445 | 7.9672   | 0.3911     |
| Rh-C           | 0.0923 | 0.1775         | -0.1230 | 0.0837 | -0.0393 | 7.3159   | 0.6877     |
| Rh-C           | 0.0967 | 0.1675         | -0.1309 | 0.0864 | -0.0445 | 8.3806   | 0.2943     |
| C=C (cod)      | 0.2916 | -0.7036        | -0.6777 | 0.2509 | -0.4268 | -12.5573 | 0.2127     |
| C=C (cod)      | 0.2874 | -0.6811        | -0.6618 | 0.2458 | -0.4160 | -12.6592 | 0.2121     |
| C=C (dpp-bian) | 0.2802 | -0.6883        | -0.6316 | 0.2298 | -0.4019 | -12.0113 | 0.1622     |
| C-N            | 0.3462 | -0.9698        | -0.8994 | 0.3285 | -0.5709 | -12.1283 | 0.2349     |
| C-N            | 0.3470 | -0.9747        | -0.9028 | 0.3295 | -0.5732 | -12.1138 | 0.2328     |
| Rh-Cl          | 0.0525 | 0.1399         | -0.0539 | 0.0444 | -0.0095 | 3.6259   | 0.0391     |

**Table S9.** Ir natural electron configuration, charges and spins on Ir and ligands for cation of **2**.

| Ir Natural configuration | v1 ground                                                                                   |        |         |          | v2 ground                                                                                   |         |         |          |
|--------------------------|---------------------------------------------------------------------------------------------|--------|---------|----------|---------------------------------------------------------------------------------------------|---------|---------|----------|
|                          | [core]6s( 0.36)5d( 7.72)6p( 0.01)7s( 0.01)6d( 0.02)                                         |        |         |          | [core]6s( 0.36)5d( 7.71)6p( 0.01)7s( 0.01)6d( 0.02)7p( 0.01)                                |         |         |          |
|                          | NPA                                                                                         |        | AIM     |          | NPA                                                                                         |         | AIM     |          |
| Ir                       | 0.8851                                                                                      |        | 0.9069  |          | 0.89423                                                                                     |         | 0.9294  |          |
| NO                       | 0.0608                                                                                      |        | -0.0578 |          | 0.07169                                                                                     |         | -0.0438 |          |
| dpp-bian                 | 0.70443                                                                                     |        | 0.7355  |          | 0.68605                                                                                     |         | 0.7057  |          |
| cod                      | 0.3497                                                                                      |        | 0.4154  |          | 0.34803                                                                                     |         | 0.4087  |          |
| Ir Natural configuration | v1 excited                                                                                  |        |         |          | v2 excited                                                                                  |         |         |          |
|                          | $\alpha$ — [core]6s( 0.17)5d( 3.86)6d( 0.01)<br>$\beta$ — [core]6s( 0.18)5d( 3.86)6d( 0.01) |        |         |          | $\alpha$ — [core]6s( 0.17)5d( 3.85)6d( 0.01)<br>$\beta$ — [core]6s( 0.18)5d( 3.86)6d( 0.01) |         |         |          |
|                          | NPA                                                                                         | NPA    | AIM     | AIM Spin | NPA                                                                                         | NPA     | AIM     | AIM Spin |
|                          |                                                                                             | Spin   |         |          |                                                                                             | Spin    |         |          |
| Ir                       | 0.9020                                                                                      | 0.0017 | 0.9284  | 0.0368   | 0.9043                                                                                      | -0.0037 | 0.9164  | 0.032    |
| NO                       | 0.0131                                                                                      | 0.2940 | -       | 0.2809   | 0.0122                                                                                      | 0.3354  | -0.0856 | 0.3199   |
|                          |                                                                                             |        | 0.0894  |          |                                                                                             |         |         |          |
| dpp-bian                 | 0.8116                                                                                      | 1.6007 | 0.8281  | 1.5850   | 0.8012                                                                                      | 1.5675  | 0.8182  | 1.5532   |
| cod                      | 0.2733                                                                                      | 0.1036 | 0.3329  | 0.0973   | 0.2824                                                                                      | 0.1009  | 0.351   | 0.0949   |

**Table S10.** Topological properties of selected bond critical points for cation of **2**: values of the electron density ( $\rho$ ), Laplacian of electron density ( $\text{Lap}$ ), positively defined kinetic energy density ( $G$ ), potential energy density ( $V$ ), total energy density ( $H$ ), metallicity [ $2$ ] ( $M$ ) and ellipticity ( $\text{elip}$ ). All values are given in atomic units.

| BOND           | $\rho$ | $\text{Lap}$ | $V$     | $G$    | $H$     | $M$      | $\text{elip}$ |
|----------------|--------|--------------|---------|--------|---------|----------|---------------|
| Ir-N(=O)       | 0.1927 | 0.4768       | -0.4090 | 0.2641 | -0.1449 | 9.2944   | 0.1213        |
| Ir-N           | 0.0927 | 0.2753       | -0.1320 | 0.1004 | -0.0316 | 4.7545   | 0.1478        |
| Ir-N           | 0.1055 | 0.3189       | -0.1618 | 0.1208 | -0.0410 | 5.0879   | 0.0710        |
| Ir-C           | 0.0883 | 0.1493       | -0.1129 | 0.0751 | -0.0378 | 8.0782   | 0.9725        |
| Ir-C           | 0.0962 | 0.1527       | -0.1287 | 0.0834 | -0.0452 | 9.1101   | 0.1941        |
| Ir-C           | 0.1127 | 0.0760       | -0.1574 | 0.0882 | -0.0692 | 23.8694  | 0.1032        |
| N=O            | 0.4003 | -0.5654      | -1.2015 | 0.5300 | -0.6714 | -26.4981 | 0.0468        |
| C=C (cod)      | 0.2933 | -0.7126      | -0.6840 | 0.2529 | -0.4311 | -12.5192 | 0.2060        |
| C=C (cod)      | 0.2614 | -0.5982      | -0.5639 | 0.2072 | -0.3567 | -12.3110 | 0.0634        |
| C=C (dpp-bian) | 0.2552 | -0.5779      | -0.5415 | 0.1985 | -0.3430 | -12.2437 | 0.0945        |
| C-N            | 0.3536 | -1.0114      | -0.9311 | 0.3392 | -0.5920 | -12.0482 | 0.2155        |
| C-N            | 0.3530 | -1.0041      | -0.9290 | 0.3390 | -0.5900 | -12.1028 | 0.2124        |

**Table S11.** Topological properties of selected bond critical points for cation of **3**: values of the electron density ( $\rho$ ), Laplacian of electron density ( $\nabla^2\rho$ ), positively defined kinetic energy density ( $G$ ), potential energy density ( $V$ ), total energy density ( $H$ ), metallicity [ $2|H|$ ] ( $M$ ) and ellipticity ( $\text{elip}$ ). All values are given in atomic units.

| BOND           | $\rho$ | $\nabla^2\rho$ | $V$     | $G$    | $H$     | $M$      | $\text{elip}$ |
|----------------|--------|----------------|---------|--------|---------|----------|---------------|
| Ir-N           | 0.1036 | 0.3681         | -0.1620 | 0.1270 | -0.0350 | 4.2805   | 0.1817        |
| Ir-N           | 0.1017 | 0.3545         | -0.1568 | 0.1227 | -0.0341 | 4.3079   | 0.1804        |
| Ir-C           | 0.1103 | 0.1545         | -0.1585 | 0.0985 | -0.0599 | 11.3046  | 0.2190        |
| Ir-C           | 0.1042 | 0.1672         | -0.1464 | 0.0941 | -0.0523 | 9.5030   | 0.5049        |
| Ir-C           | 0.1053 | 0.1700         | -0.1489 | 0.0957 | -0.0532 | 9.5088   | 0.3660        |
| Ir-C           | 0.1084 | 0.1516         | -0.1543 | 0.0961 | -0.0582 | 11.2067  | 0.3361        |
| C=C (cod)      | 0.2890 | -0.6882        | -0.6681 | 0.2480 | -0.4201 | -12.6489 | 0.2173        |
| C=C (cod)      | 0.2894 | -0.6905        | -0.6696 | 0.2485 | -0.4211 | -12.6362 | 0.2173        |
| C=C (dpp-bian) | 0.2680 | -0.6389        | -0.5864 | 0.2134 | -0.3731 | -12.0148 | 0.1137        |
| C-N            | 0.3580 | -1.0148        | -0.9517 | 0.3490 | -0.6027 | -12.2536 | 0.2255        |
| C-N            | 0.3570 | -1.0090        | -0.9475 | 0.3476 | -0.5999 | -12.2692 | 0.2293        |

**Table S12.** Topological properties of selected bond critical points for cation of **4**: values of the electron density ( $\rho$ ), Laplacian of electron density ( $\nabla^2\rho$ ), positively defined kinetic energy density ( $G$ ), potential energy density ( $V$ ), total energy density ( $H$ ), metallicity [ $2|G|/|V|$ ] ( $M$ ) and ellipticity ( $\text{elip}$ ). All values are given in atomic units.

| BOND           | $\rho$ | $\nabla^2\rho$ | $V$     | $G$    | $H$     | $M$      | $\text{elip}$ |
|----------------|--------|----------------|---------|--------|---------|----------|---------------|
| Ir-N           | 0.1045 | 0.3369         | -0.1611 | 0.1227 | -0.0384 | 4.7384   | 0.1050        |
| Ir-N           | 0.1055 | 0.3390         | -0.1636 | 0.1242 | -0.0394 | 4.7897   | 0.1104        |
| Ir-C           | 0.1036 | 0.1433         | -0.1433 | 0.0895 | -0.0537 | 10.9995  | 0.3273        |
| Ir-C           | 0.1016 | 0.1503         | -0.1397 | 0.0886 | -0.0510 | 10.1503  | 0.3790        |
| Ir-C           | 0.1008 | 0.1522         | -0.1381 | 0.0881 | -0.0500 | 9.8871   | 0.4071        |
| Ir-C           | 0.1039 | 0.1421         | -0.1438 | 0.0897 | -0.0541 | 11.1411  | 0.3092        |
| C=C (cod)      | 0.2895 | -0.6943        | -0.6697 | 0.2481 | -0.4216 | -12.5746 | 0.2004        |
| C=C (cod)      | 0.2894 | -0.6938        | -0.6693 | 0.2479 | -0.4214 | -12.5764 | 0.2002        |
| C=C (dpp-bian) | 0.2617 | -0.6122        | -0.5638 | 0.2054 | -0.3584 | -12.0514 | 0.0936        |
| C-N            | 0.3582 | -1.0137        | -0.9531 | 0.3498 | -0.6033 | -12.2824 | 0.2160        |
| C-N            | 0.3582 | -1.0119        | -0.9533 | 0.3501 | -0.6031 | -12.3049 | 0.2173        |

**Table S13.** Cartesian atomic coordinates for model supramolecular associates used for theoretical analysis of intermolecular  $\pi$ - $\pi$  interactions in the crystal structures **2** and **3**.

| Atom     | X         | Y         | Z         |
|----------|-----------|-----------|-----------|
| <b>2</b> |           |           |           |
| C        | 1.518120  | 8.314622  | 9.898284  |
| C        | 1.964771  | 9.404953  | 10.670391 |
| C        | 2.155167  | 9.611232  | 12.063408 |
| H        | 1.996447  | 8.916412  | 12.692342 |
| C        | 2.606633  | 10.946377 | 12.496836 |
| H        | 2.731569  | 11.118019 | 13.422053 |
| C        | 2.848582  | 11.932435 | 11.597725 |
| H        | 3.149336  | 12.773146 | 11.920175 |
| C        | 2.672651  | 11.762425 | 10.188580 |
| C        | 2.223605  | 10.454482 | 9.805551  |
| C        | 1.487542  | 8.779316  | 8.468980  |
| C        | 1.925016  | 10.157531 | 8.440757  |
| C        | 2.093643  | 11.139055 | 7.448913  |
| H        | 1.920129  | 10.956260 | 6.532283  |
| C        | 2.536381  | 12.415264 | 7.880325  |
| H        | 2.653925  | 13.097774 | 7.231130  |
| C        | 2.808307  | 12.712214 | 9.216895  |
| H        | 3.091708  | 13.587834 | 9.453406  |
| C        | -1.669573 | 10.368343 | 7.686794  |
| H        | -0.795604 | 10.523234 | 8.100808  |
| H        | -1.873162 | 11.099024 | 7.067173  |
| H        | -2.358767 | 10.328470 | 8.383040  |
| C        | -1.643096 | 9.033198  | 6.914687  |
| H        | -1.457341 | 8.301928  | 7.571542  |

|   |           |           |           |
|---|-----------|-----------|-----------|
| C | -2.980255 | 8.738514  | 6.249426  |
| H | -3.689155 | 8.733890  | 6.926400  |
| H | -3.172186 | 9.429163  | 5.580899  |
| H | -2.941491 | 7.862486  | 5.811623  |
| C | -0.506289 | 9.051332  | 5.892604  |
| C | -0.663167 | 9.574963  | 4.664894  |
| H | -1.512642 | 9.929219  | 4.429472  |
| C | 0.346061  | 9.622566  | 3.733528  |
| H | 0.198386  | 10.029298 | 2.888263  |
| C | 1.589782  | 9.067200  | 4.037936  |
| H | 2.278022  | 9.088417  | 3.384790  |
| C | 1.851129  | 8.473298  | 5.291853  |
| C | 0.772823  | 8.482366  | 6.227251  |
| C | 3.523952  | 6.648524  | 4.701181  |
| H | 4.415260  | 6.309207  | 4.926402  |
| H | 2.856605  | 5.950531  | 4.871448  |
| H | 3.499155  | 6.899572  | 3.754534  |
| C | 3.201278  | 7.911132  | 5.590212  |
| H | 3.187995  | 7.605545  | 6.541718  |
| C | 4.316404  | 8.940259  | 5.467240  |
| H | 5.175826  | 8.517750  | 5.673430  |
| H | 4.336703  | 9.292905  | 4.552687  |
| H | 4.154101  | 9.674680  | 6.096073  |
| C | -1.620654 | 9.085334  | 11.432418 |
| H | -0.742290 | 9.460558  | 11.213204 |
| H | -2.297683 | 9.470872  | 10.836747 |
| H | -1.844674 | 9.297802  | 12.361848 |



|   |           |          |           |
|---|-----------|----------|-----------|
| C | -1.586888 | 7.575646 | 11.250983 |
| H | -1.407917 | 7.392012 | 10.283330 |
| C | -2.936127 | 6.977210 | 11.583613 |
| H | -2.902073 | 6.005592 | 11.462637 |
| H | -3.163917 | 7.183557 | 12.513770 |
| H | -3.616926 | 7.356650 | 10.988668 |
| C | -0.474863 | 6.974944 | 12.031153 |
| C | -0.665162 | 6.619056 | 13.361676 |
| H | -1.502328 | 6.805682 | 13.771255 |
| C | 0.318720  | 6.004753 | 14.107575 |
| H | 0.154447  | 5.748310 | 15.007049 |
| C | 1.576780  | 5.764472 | 13.508840 |
| H | 2.251932  | 5.330879 | 14.017523 |
| C | 0.809727  | 6.736930 | 11.539263 |
| C | 1.853787  | 6.136228 | 12.228715 |
| C | 3.238178  | 5.914081 | 11.712634 |
| H | 3.261822  | 6.256776 | 10.774837 |
| C | 4.303529  | 6.657592 | 12.488772 |
| H | 5.183361  | 6.469017 | 12.100784 |
| H | 4.127416  | 7.621480 | 12.444018 |
| H | 4.290525  | 6.367668 | 13.425037 |
| C | 3.588564  | 4.359056 | 11.654171 |
| H | 4.499659  | 4.243586 | 11.313013 |
| H | 3.524613  | 3.976103 | 12.553484 |
| H | 2.956269  | 3.905130 | 11.059145 |
| C | -0.878322 | 5.687401 | 6.729221  |
| H | -0.968586 | 6.430368 | 6.064786  |

|    |           |           |           |
|----|-----------|-----------|-----------|
| C  | -2.189727 | 5.204573  | 7.331988  |
| H  | -2.784801 | 5.989906  | 7.429580  |
| H  | -2.615981 | 4.594328  | 6.680495  |
| C  | -2.142901 | 4.497331  | 8.662511  |
| H  | -2.255176 | 3.524783  | 8.513412  |
| H  | -2.900168 | 4.807361  | 9.219032  |
| C  | 0.181274  | 4.862286  | 6.523594  |
| H  | 0.761322  | 5.133055  | 5.754592  |
| C  | 0.223368  | 3.368465  | 6.830018  |
| H  | -0.648818 | 2.976331  | 6.575182  |
| H  | 0.913573  | 2.954298  | 6.254385  |
| C  | 0.516803  | 2.980842  | 8.277465  |
| H  | -0.061308 | 2.213916  | 8.519338  |
| H  | 1.455719  | 2.679766  | 8.338428  |
| C  | 0.305778  | 4.037171  | 9.241087  |
| H  | 0.815838  | 3.910570  | 10.091452 |
| C  | -0.871131 | 4.730812  | 9.398330  |
| H  | -1.028473 | 4.998883  | 10.349473 |
| N  | 2.385482  | 5.537792  | 7.908548  |
| N  | 0.984398  | 7.983670  | 7.569869  |
| N  | 1.040166  | 7.135886  | 10.142214 |
| Ir | 0.498581  | 6.087265  | 8.372416  |
| O  | 2.910833  | 4.857752  | 7.499311  |
| C  | 7.092165  | 14.353378 | 10.261154 |
| C  | 6.645514  | 13.263047 | 9.489048  |
| C  | 6.455119  | 13.056768 | 8.096031  |
| H  | 6.613839  | 13.751588 | 7.467096  |

|   |           |           |           |
|---|-----------|-----------|-----------|
| C | 6.003652  | 11.721623 | 7.662603  |
| H | 5.878717  | 11.549981 | 6.737385  |
| C | 5.761703  | 10.735565 | 8.561714  |
| H | 5.460949  | 9.894854  | 8.239263  |
| C | 5.937634  | 10.905575 | 9.970858  |
| C | 6.386680  | 12.213518 | 10.353888 |
| C | 7.122743  | 13.888684 | 11.690458 |
| C | 6.685270  | 12.510469 | 11.718682 |
| C | 6.516643  | 11.528945 | 12.710526 |
| H | 6.690156  | 11.711740 | 13.627156 |
| C | 6.073904  | 10.252736 | 12.279114 |
| H | 5.956361  | 9.570226  | 12.928308 |
| C | 5.801978  | 9.955786  | 10.942543 |
| H | 5.518578  | 9.080166  | 10.706033 |
| C | 10.279858 | 12.299657 | 12.472645 |
| H | 9.405890  | 12.144766 | 12.058630 |
| H | 10.483447 | 11.568976 | 13.092265 |
| H | 10.969053 | 12.339530 | 11.776398 |
| C | 10.253381 | 13.634802 | 13.244751 |
| H | 10.067627 | 14.366072 | 12.587896 |
| C | 11.590540 | 13.929486 | 13.910013 |
| H | 12.299440 | 13.934110 | 13.233039 |
| H | 11.782471 | 13.238837 | 14.578540 |
| H | 11.551777 | 14.805514 | 14.347815 |
| C | 9.116575  | 13.616668 | 14.266835 |
| C | 9.273452  | 13.093037 | 15.494545 |
| H | 10.122928 | 12.738781 | 15.729966 |

|   |           |           |           |
|---|-----------|-----------|-----------|
| C | 8.264224  | 13.045434 | 16.425911 |
| H | 8.411899  | 12.638702 | 17.271176 |
| C | 7.020504  | 13.600800 | 16.121503 |
| H | 6.332264  | 13.579583 | 16.774649 |
| C | 6.759156  | 14.194702 | 14.867586 |
| C | 7.837462  | 14.185634 | 13.932188 |
| C | 5.086334  | 16.019476 | 15.458258 |
| H | 4.195026  | 16.358793 | 15.233036 |
| H | 5.753680  | 16.717469 | 15.287991 |
| H | 5.111130  | 15.768428 | 16.404904 |
| C | 5.409008  | 14.756868 | 14.569226 |
| H | 5.422290  | 15.062455 | 13.617721 |
| C | 4.293881  | 13.727741 | 14.692199 |
| H | 3.434459  | 14.150250 | 14.486008 |
| H | 4.273582  | 13.375095 | 15.606752 |
| H | 4.456184  | 12.993320 | 14.063365 |
| C | 10.230939 | 13.582666 | 8.727021  |
| H | 9.352575  | 13.207442 | 8.946235  |
| H | 10.907968 | 13.197128 | 9.322692  |
| H | 10.454959 | 13.370198 | 7.797590  |
| C | 10.197173 | 15.092354 | 8.908456  |
| H | 10.018203 | 15.275988 | 9.876109  |
| C | 11.546413 | 15.690790 | 8.575825  |
| H | 11.512358 | 16.662408 | 8.696802  |
| H | 11.774203 | 15.484443 | 7.645669  |
| H | 12.227211 | 15.311350 | 9.170771  |
| C | 9.085148  | 15.693056 | 8.128286  |

|   |           |           |           |
|---|-----------|-----------|-----------|
| C | 9.275448  | 16.048944 | 6.797763  |
| H | 10.112613 | 15.862318 | 6.388183  |
| C | 8.291566  | 16.663247 | 6.051863  |
| H | 8.455839  | 16.919690 | 5.152390  |
| C | 7.033506  | 16.903528 | 6.650599  |
| H | 6.358353  | 17.337121 | 6.141916  |
| C | 7.800558  | 15.931070 | 8.620176  |
| C | 6.756499  | 16.531772 | 7.930723  |
| C | 5.372107  | 16.753919 | 8.446805  |
| H | 5.348463  | 16.411224 | 9.384602  |
| C | 4.306757  | 16.010408 | 7.670666  |
| H | 3.426924  | 16.198983 | 8.058655  |
| H | 4.482869  | 15.046520 | 7.715420  |
| H | 4.319760  | 16.300332 | 6.734402  |
| C | 5.021721  | 18.308944 | 8.505267  |
| H | 4.110626  | 18.424414 | 8.846425  |
| H | 5.085672  | 18.691897 | 7.605955  |
| H | 5.654016  | 18.762870 | 9.100293  |
| C | 9.488607  | 16.980599 | 13.430218 |
| H | 9.578872  | 16.237632 | 14.094653 |
| C | 10.800012 | 17.463427 | 12.827451 |
| H | 11.395086 | 16.678094 | 12.729859 |
| H | 11.226267 | 18.073672 | 13.478943 |
| C | 10.753186 | 18.170669 | 11.496928 |
| H | 10.865462 | 19.143217 | 11.646027 |
| H | 11.510453 | 17.860639 | 10.940406 |
| C | 8.429012  | 17.805714 | 13.635844 |

|    |          |           |           |
|----|----------|-----------|-----------|
| H  | 7.848964 | 17.534945 | 14.404846 |
| C  | 8.386917 | 19.299535 | 13.329421 |
| H  | 9.259103 | 19.691669 | 13.584256 |
| H  | 7.696712 | 19.713702 | 13.905053 |
| C  | 8.093483 | 19.687158 | 11.881973 |
| H  | 8.671594 | 20.454084 | 11.640100 |
| H  | 7.154566 | 19.988234 | 11.821011 |
| C  | 8.304507 | 18.630829 | 10.918352 |
| H  | 7.794447 | 18.757430 | 10.067987 |
| C  | 9.481416 | 17.937188 | 10.761108 |
| H  | 9.638758 | 17.669117 | 9.809966  |
| N  | 6.224803 | 17.130208 | 12.250891 |
| N  | 7.625887 | 14.684330 | 12.589569 |
| N  | 7.570120 | 15.532114 | 10.017225 |
| Ir | 8.111704 | 16.580735 | 11.787022 |
| O  | 5.699452 | 17.810248 | 12.660127 |

### 3

|   |           |           |           |
|---|-----------|-----------|-----------|
| C | 19.117679 | 12.712833 | 10.287628 |
| H | 19.658116 | 13.482585 | 10.593917 |
| H | 19.576774 | 11.890333 | 10.593917 |
| C | 17.771733 | 12.781442 | 10.976284 |
| H | 17.709965 | 12.221976 | 11.802900 |
| C | 16.922193 | 13.885239 | 10.976284 |
| H | 16.366864 | 13.960446 | 11.804895 |
| C | 17.184522 | 15.192844 | 10.320239 |
| H | 16.501439 | 15.837466 | 10.629539 |
| H | 18.065541 | 15.523176 | 10.629462 |

|   |           |           |          |
|---|-----------|-----------|----------|
| C | 13.931045 | 10.860392 | 8.844905 |
| C | 12.819782 | 10.029013 | 8.398142 |
| C | 12.365752 | 9.577001  | 7.187720 |
| H | 12.769395 | 9.871374  | 6.379864 |
| C | 11.288189 | 8.670959  | 7.160865 |
| H | 10.961388 | 8.367486  | 6.322220 |
| C | 10.690887 | 8.206840  | 8.317575 |
| H | 9.971159  | 7.591337  | 8.261505 |
| C | 11.144917 | 8.644726  | 9.591300 |
| C | 12.208355 | 9.538661  | 9.591300 |
| C | 15.087913 | 11.310386 | 6.817496 |
| C | 14.409895 | 12.180105 | 5.956197 |
| C | 14.637919 | 12.002529 | 4.590396 |
| H | 14.209174 | 12.582476 | 3.971949 |
| C | 15.455173 | 11.023842 | 4.120422 |
| H | 15.572111 | 10.917700 | 3.183909 |
| C | 16.113011 | 10.188428 | 4.989394 |
| H | 16.690073 | 9.518744  | 4.641882 |
| C | 15.955614 | 10.303448 | 6.374378 |
| C | 18.076438 | 9.034183  | 6.899981 |
| H | 18.055431 | 8.389985  | 6.162353 |
| H | 18.560272 | 8.646381  | 7.659171 |
| H | 18.531194 | 9.851840  | 6.606986 |
| C | 16.653811 | 9.369156  | 7.321998 |
| H | 16.704380 | 9.824538  | 8.211457 |
| C | 15.854719 | 8.069622  | 7.513824 |
| H | 14.956184 | 8.285236  | 7.842250 |

|    |           |           |           |
|----|-----------|-----------|-----------|
| H  | 16.311392 | 7.497121  | 8.163673  |
| H  | 15.784193 | 7.600559  | 6.656228  |
| C  | 12.036833 | 12.979197 | 5.927423  |
| H  | 12.032737 | 13.060801 | 4.951662  |
| H  | 11.421875 | 13.637419 | 6.313799  |
| H  | 11.752389 | 12.077111 | 6.182456  |
| C  | 13.443316 | 13.233454 | 6.451108  |
| H  | 13.418859 | 13.190694 | 7.450215  |
| C  | 13.824701 | 14.652045 | 6.042519  |
| H  | 14.697710 | 14.879624 | 6.424176  |
| H  | 13.149146 | 15.280623 | 6.377006  |
| H  | 13.868490 | 14.710947 | 5.065875  |
| N  | 14.923655 | 11.452245 | 8.252930  |
| Ir | 16.191508 | 12.447074 | 9.591300  |
| C  | 19.117679 | 12.712833 | 8.894972  |
| H  | 19.658116 | 13.482585 | 8.588683  |
| H  | 19.576774 | 11.890333 | 8.588683  |
| C  | 17.771733 | 12.781442 | 8.206316  |
| H  | 17.709965 | 12.221976 | 7.379700  |
| C  | 16.922193 | 13.885239 | 8.206316  |
| H  | 16.366864 | 13.960446 | 7.377705  |
| C  | 17.184522 | 15.192844 | 8.862361  |
| H  | 16.501439 | 15.837466 | 8.553061  |
| H  | 18.065541 | 15.523176 | 8.553138  |
| C  | 13.931045 | 10.860392 | 10.337695 |
| C  | 12.819782 | 10.029013 | 10.784458 |
| C  | 12.365752 | 9.577001  | 11.994880 |



|   |           |           |           |
|---|-----------|-----------|-----------|
| H | 12.769395 | 9.871374  | 12.802736 |
| C | 11.288189 | 8.670959  | 12.021735 |
| H | 10.961388 | 8.367486  | 12.860380 |
| C | 10.690887 | 8.206840  | 10.865025 |
| H | 9.971159  | 7.591337  | 10.921095 |
| C | 15.087913 | 11.310386 | 12.365104 |
| C | 14.409895 | 12.180105 | 13.226403 |
| C | 14.637919 | 12.002529 | 14.592204 |
| H | 14.209174 | 12.582476 | 15.210651 |
| C | 15.455173 | 11.023842 | 15.062178 |
| H | 15.572111 | 10.917700 | 15.998691 |
| C | 16.113011 | 10.188428 | 14.193206 |
| H | 16.690073 | 9.518744  | 14.540718 |
| C | 15.955614 | 10.303448 | 12.808222 |
| C | 18.076438 | 9.034183  | 12.282619 |
| H | 18.055431 | 8.389985  | 13.020247 |
| H | 18.560272 | 8.646381  | 11.523429 |
| H | 18.531194 | 9.851840  | 12.575614 |
| C | 16.653811 | 9.369156  | 11.860602 |
| H | 16.704380 | 9.824538  | 10.971143 |
| C | 15.854719 | 8.069622  | 11.668776 |
| H | 14.956184 | 8.285236  | 11.340350 |
| H | 16.311392 | 7.497121  | 11.018927 |
| H | 15.784193 | 7.600559  | 12.526372 |
| C | 12.036833 | 12.979197 | 13.255177 |
| H | 12.032737 | 13.060801 | 14.230938 |
| H | 11.421875 | 13.637419 | 12.868801 |

|   |           |           |           |
|---|-----------|-----------|-----------|
| H | 11.752389 | 12.077111 | 13.000144 |
| C | 13.443316 | 13.233454 | 12.731492 |
| H | 13.418859 | 13.190694 | 11.732385 |
| C | 13.824701 | 14.652045 | 13.140081 |
| H | 14.697710 | 14.879624 | 12.758424 |
| H | 13.149146 | 15.280623 | 12.805594 |
| H | 13.868490 | 14.710947 | 14.116725 |
| N | 14.923655 | 11.452245 | 10.929670 |
| C | 1.061421  | 7.466267  | 10.287628 |
| H | 0.520984  | 6.696515  | 10.593917 |
| H | 0.602326  | 8.288767  | 10.593917 |
| C | 2.407367  | 7.397658  | 10.976284 |
| H | 2.469135  | 7.957124  | 11.802900 |
| C | 3.256907  | 6.293861  | 10.976284 |
| H | 3.812236  | 6.218654  | 11.804895 |
| C | 2.994578  | 4.986256  | 10.320239 |
| H | 3.677661  | 4.341634  | 10.629539 |
| H | 2.113559  | 4.655924  | 10.629462 |
| C | 6.248055  | 9.318708  | 8.844905  |
| C | 7.359318  | 10.150087 | 8.398142  |
| C | 7.813348  | 10.602099 | 7.187720  |
| H | 7.409705  | 10.307726 | 6.379864  |
| C | 8.890911  | 11.508141 | 7.160865  |
| H | 9.217712  | 11.811614 | 6.322220  |
| C | 9.488213  | 11.972260 | 8.317575  |
| H | 10.207941 | 12.587763 | 8.261505  |
| C | 9.034183  | 11.534374 | 9.591300  |

|   |          |           |          |
|---|----------|-----------|----------|
| C | 7.970745 | 10.640439 | 9.591300 |
| C | 5.091187 | 8.868714  | 6.817496 |
| C | 5.769205 | 7.998995  | 5.956197 |
| C | 5.541181 | 8.176571  | 4.590396 |
| H | 5.969926 | 7.596624  | 3.971949 |
| C | 4.723927 | 9.155258  | 4.120422 |
| H | 4.606989 | 9.261400  | 3.183909 |
| C | 4.066089 | 9.990672  | 4.989394 |
| H | 3.489027 | 10.660356 | 4.641882 |
| C | 4.223486 | 9.875652  | 6.374378 |
| C | 2.102662 | 11.144917 | 6.899981 |
| H | 2.123669 | 11.789115 | 6.162353 |
| H | 1.618828 | 11.532719 | 7.659171 |
| H | 1.647906 | 10.327260 | 6.606986 |
| C | 3.525289 | 10.809944 | 7.321998 |
| H | 3.474720 | 10.354562 | 8.211457 |
| C | 4.324381 | 12.109478 | 7.513824 |
| H | 5.222916 | 11.893864 | 7.842250 |
| H | 3.867708 | 12.681979 | 8.163673 |
| H | 4.394907 | 12.578541 | 6.656228 |
| C | 8.142267 | 7.199903  | 5.927423 |
| H | 8.146363 | 7.118299  | 4.951662 |
| H | 8.757225 | 6.541681  | 6.313799 |
| H | 8.426711 | 8.101989  | 6.182456 |
| C | 6.735784 | 6.945646  | 6.451108 |
| H | 6.760241 | 6.988406  | 7.450215 |
| C | 6.354399 | 5.527055  | 6.042519 |

|    |           |           |           |
|----|-----------|-----------|-----------|
| H  | 5.481390  | 5.299476  | 6.424176  |
| H  | 7.029954  | 4.898477  | 6.377006  |
| H  | 6.310610  | 5.468153  | 5.065875  |
| N  | 5.255445  | 8.726855  | 8.252930  |
| Ir | 3.987592  | 7.732026  | 9.591300  |
| C  | 1.061421  | 7.466267  | 8.894972  |
| H  | 0.520984  | 6.696515  | 8.588683  |
| H  | 0.602326  | 8.288767  | 8.588683  |
| C  | 2.407367  | 7.397658  | 8.206316  |
| H  | 2.469135  | 7.957124  | 7.379700  |
| C  | 3.256907  | 6.293861  | 8.206316  |
| H  | 3.812236  | 6.218654  | 7.377705  |
| C  | 2.994578  | 4.986256  | 8.862361  |
| H  | 3.677661  | 4.341634  | 8.553061  |
| H  | 2.113559  | 4.655924  | 8.553138  |
| C  | 6.248055  | 9.318708  | 10.337695 |
| C  | 7.359318  | 10.150087 | 10.784458 |
| C  | 7.813348  | 10.602099 | 11.994880 |
| H  | 7.409705  | 10.307726 | 12.802736 |
| C  | 8.890911  | 11.508141 | 12.021735 |
| H  | 9.217712  | 11.811614 | 12.860380 |
| C  | 9.488213  | 11.972260 | 10.865025 |
| H  | 10.207941 | 12.587763 | 10.921095 |
| C  | 5.091187  | 8.868714  | 12.365104 |
| C  | 5.769205  | 7.998995  | 13.226403 |
| C  | 5.541181  | 8.176571  | 14.592204 |
| H  | 5.969926  | 7.596624  | 15.210651 |

|   |          |           |           |
|---|----------|-----------|-----------|
| C | 4.723927 | 9.155258  | 15.062178 |
| H | 4.606989 | 9.261400  | 15.998691 |
| C | 4.066089 | 9.990672  | 14.193206 |
| H | 3.489027 | 10.660356 | 14.540718 |
| C | 4.223486 | 9.875652  | 12.808222 |
| C | 2.102662 | 11.144917 | 12.282619 |
| H | 2.123669 | 11.789115 | 13.020247 |
| H | 1.618828 | 11.532719 | 11.523429 |
| H | 1.647906 | 10.327260 | 12.575614 |
| C | 3.525289 | 10.809944 | 11.860602 |
| H | 3.474720 | 10.354562 | 10.971143 |
| C | 4.324381 | 12.109478 | 11.668776 |
| H | 5.222916 | 11.893864 | 11.340350 |
| H | 3.867708 | 12.681979 | 11.018927 |
| H | 4.394907 | 12.578541 | 12.526372 |
| C | 8.142267 | 7.199903  | 13.255177 |
| H | 8.146363 | 7.118299  | 14.230938 |
| H | 8.757225 | 6.541681  | 12.868801 |
| H | 8.426711 | 8.101989  | 13.000144 |
| C | 6.735784 | 6.945646  | 12.731492 |
| H | 6.760241 | 6.988406  | 11.732385 |
| C | 6.354399 | 5.527055  | 13.140081 |
| H | 5.481390 | 5.299476  | 12.758424 |
| H | 7.029954 | 4.898477  | 12.805594 |
| H | 6.310610 | 5.468153  | 14.116725 |
| N | 5.255445 | 8.726855  | 10.929670 |

**Table S14.** Values of the density of all electrons ( $\rho$ ), Laplacian of electron density (Lap) and appropriate  $\lambda_2$  eigenvalues, energy density (H), potential energy density (V), positively defined kinetic energy density (G), and electron localization function (ELF) at the bond critical points, corresponding to intermolecular C...C contacts in the crystal structures **2** and **3** (all values are given in atomic units) and their estimated strength ( $E_{\text{int}} = -V/2$ , in kcal/mol).

| Contact  | $\rho$ | Lap   | $\lambda_2$ | H     | V      | G     | ELF   | $E_{\text{int}}$ |
|----------|--------|-------|-------------|-------|--------|-------|-------|------------------|
| <b>2</b> |        |       |             |       |        |       |       |                  |
| 3.543 Å  | 0.005  | 0.014 | -0.005      | 0.001 | -0.002 | 0.003 | 0.020 | 0.6              |
| 3.691 Å  | 0.006  | 0.018 | -0.006      | 0.001 | -0.002 | 0.003 | 0.021 | 0.6              |
| 3.700 Å  | 0.005  | 0.014 | -0.005      | 0.001 | -0.002 | 0.003 | 0.020 | 0.6              |
| <b>3</b> |        |       |             |       |        |       |       |                  |
| 3.578 Å  | 0.004  | 0.012 | -0.004      | 0.000 | -0.002 | 0.002 | 0.016 | 0.6              |
| 3.714 Å  | 0.003  | 0.009 | -0.003      | 0.001 | -0.001 | 0.002 | 0.017 | 0.3              |
| 3.714 Å  | 0.003  | 0.009 | -0.003      | 0.001 | -0.001 | 0.002 | 0.017 | 0.3              |

**Table S15.** Parameters of electrochemical experiments performed by cyclic voltammetry at different sweep rates for the first reduction process for complex **1**.

| Sweep rate | $E_c$ , V | $E_a$ , V | $E_{1/2}$ , V | $\Delta E$ , mV | $I_c \cdot 10^6$ , A | $I_a \cdot 10^6$ , A |
|------------|-----------|-----------|---------------|-----------------|----------------------|----------------------|
| 50 mV/s    | -0.32     | -0.21     | -0.27         | 90              | -2.9                 | 1.6                  |
| 100 mV/s   | -0.32     | -0.21     | -0.27         | 90              | -3.9                 | 2.7                  |
| 150 mV/s   | -0.32     | -0.21     | -0.27         | 90              | -4.8                 | 3.6                  |
| 200 mV/s   | -0.32     | -0.21     | -0.27         | 90              | -5.5                 | 4.1                  |

**Table S16.** Parameters of electrochemical experiments performed by cyclic voltammetry at different sweep rates for the oxidation process for complex **1**.

| Sweep rate | $E_c$ , V | $E_a$ , V | $E_{1/2}$ , V | $\Delta E$ , mV | $I_c \cdot 10^6$ , A | $I_a \cdot 10^6$ , A |
|------------|-----------|-----------|---------------|-----------------|----------------------|----------------------|
| 50 mV/s    | 0.57      | 0.67      | 0.62          | 100             | -1.1                 | 2.4                  |
| 100 mV/s   | 0.57      | 0.67      | 0.62          | 100             | -2.0                 | 3.9                  |
| 150 mV/s   | 0.57      | 0.67      | 0.62          | 100             | -2.8                 | 5.3                  |
| 200 mV/s   | 0.57      | 0.67      | 0.62          | 100             | -3.4                 | 6.0                  |

**Table S17.** Parameters of electrochemical experiments performed by cyclic voltammetry at different sweep rates for the first reduction process for complex **3**.

| Sweep rate | $E_c$ , V | $E_a$ , V | $E_{1/2}$ , V | $\Delta E$ , mV | $I_c \cdot 10^6$ , A | $I_a \cdot 10^6$ , A |
|------------|-----------|-----------|---------------|-----------------|----------------------|----------------------|
| 50 mV/s    | -0.23     | -0.15     | -0.19         | 80              | 5.3                  | 2.8                  |
| 100 mV/s   | -0.24     | -0.14     | -0.19         | 100             | 7.5                  | 3.9                  |
| 150 mV/s   | -0.24     | -0.14     | -0.19         | 100             | 9.2                  | 5.5                  |
| 200 mV/s   | -0.25     | -0.14     | -0.19         | 110             | 10.7                 | 6.5                  |

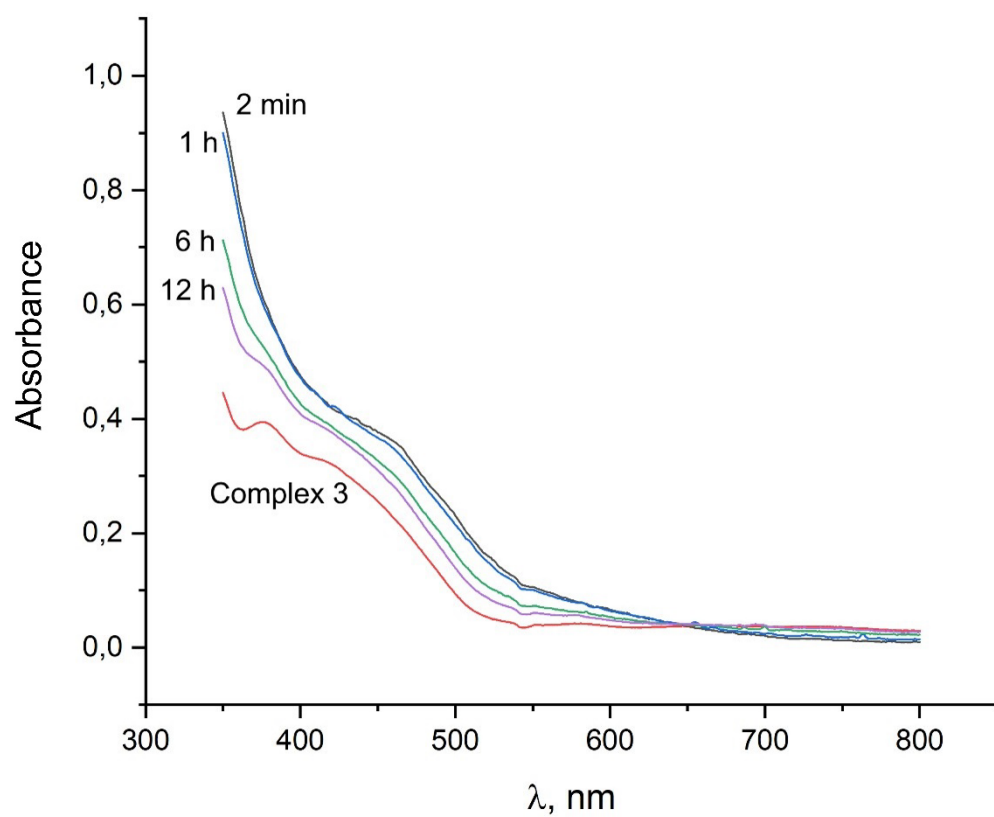

**Figure S1.** UV-vis spectra of **2** in  $\text{CH}_2\text{Cl}_2$  depending on time. Red line is the UV spectrum of **3** under the same conditions.



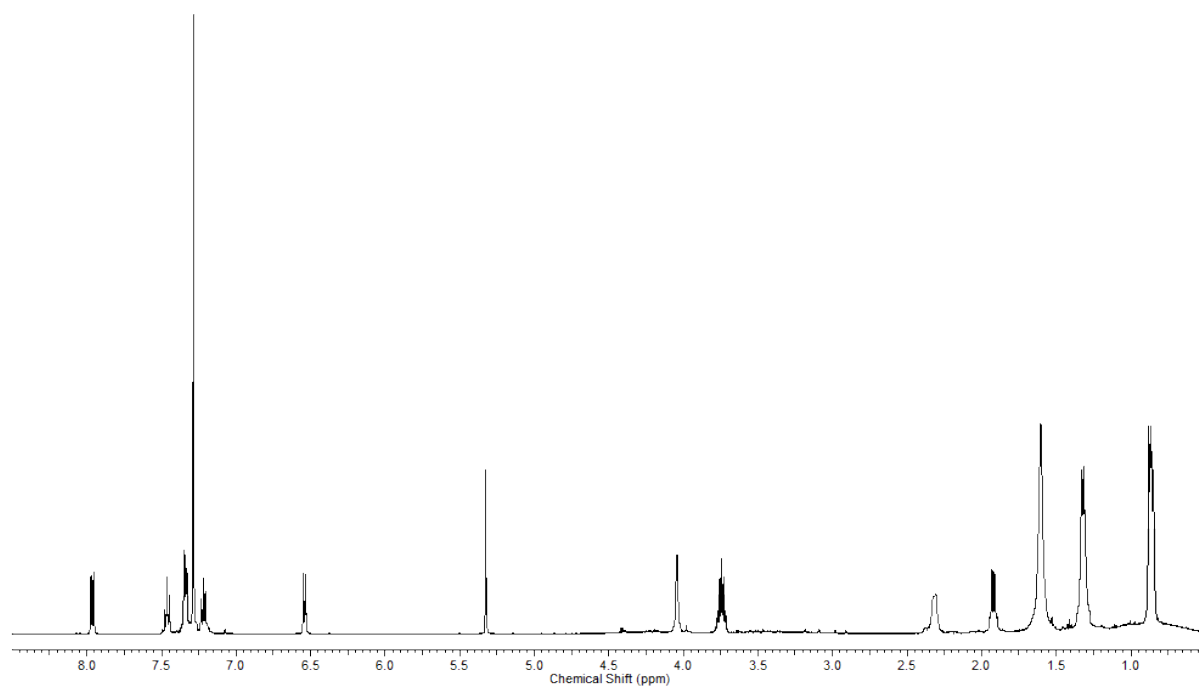

**Figure S2.**  $^1\text{H}$  NMR spectrum of **1** in  $\text{CDCl}_3$ .

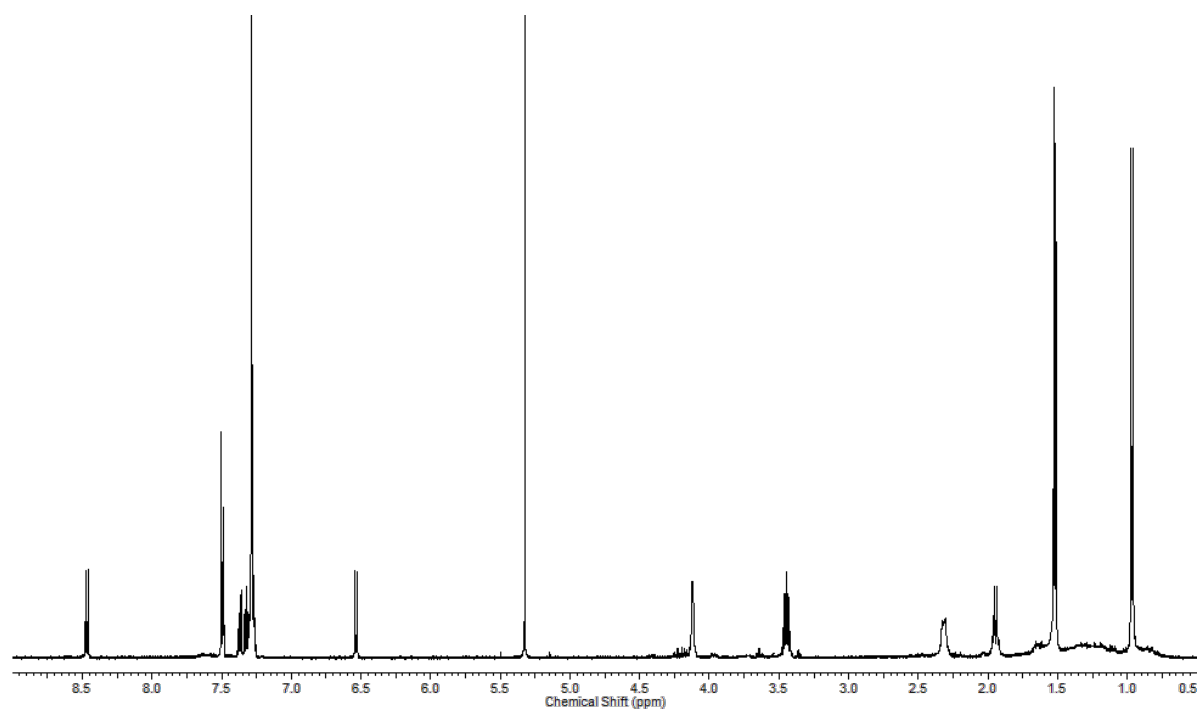

**Figure S3.**  $^1\text{H}$  NMR spectrum of **3** in  $\text{CDCl}_3$ .

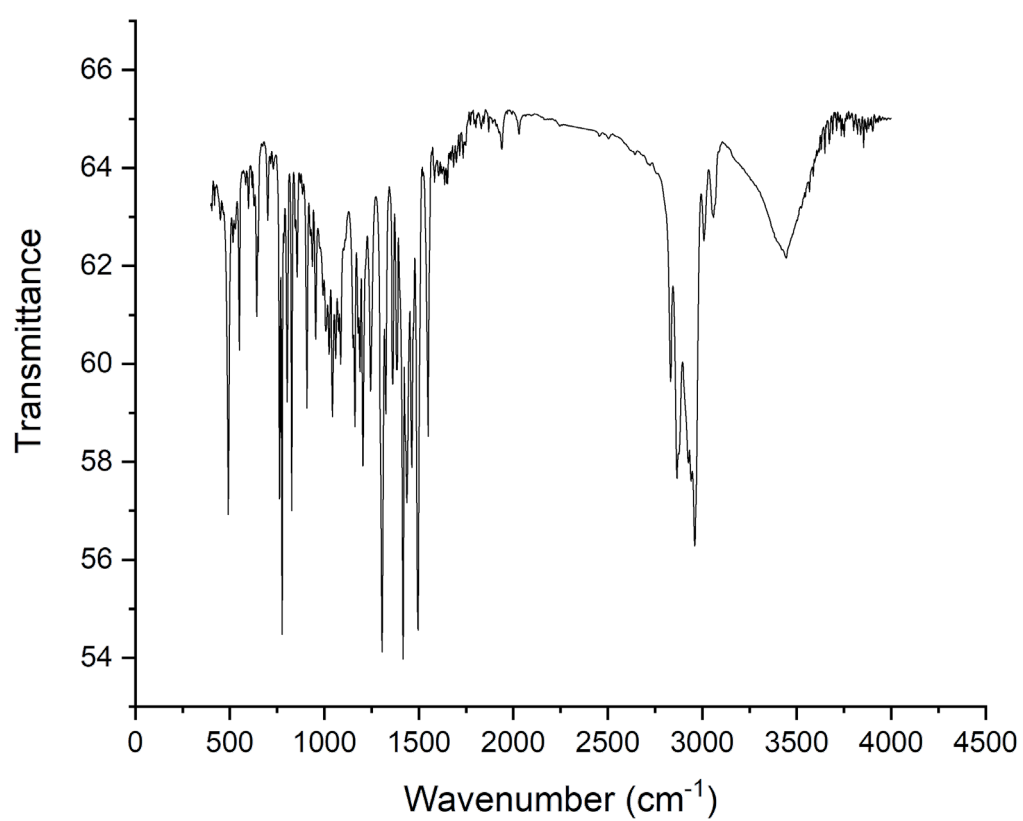

**Figure S4.** FT-IR spectrum of **1**.

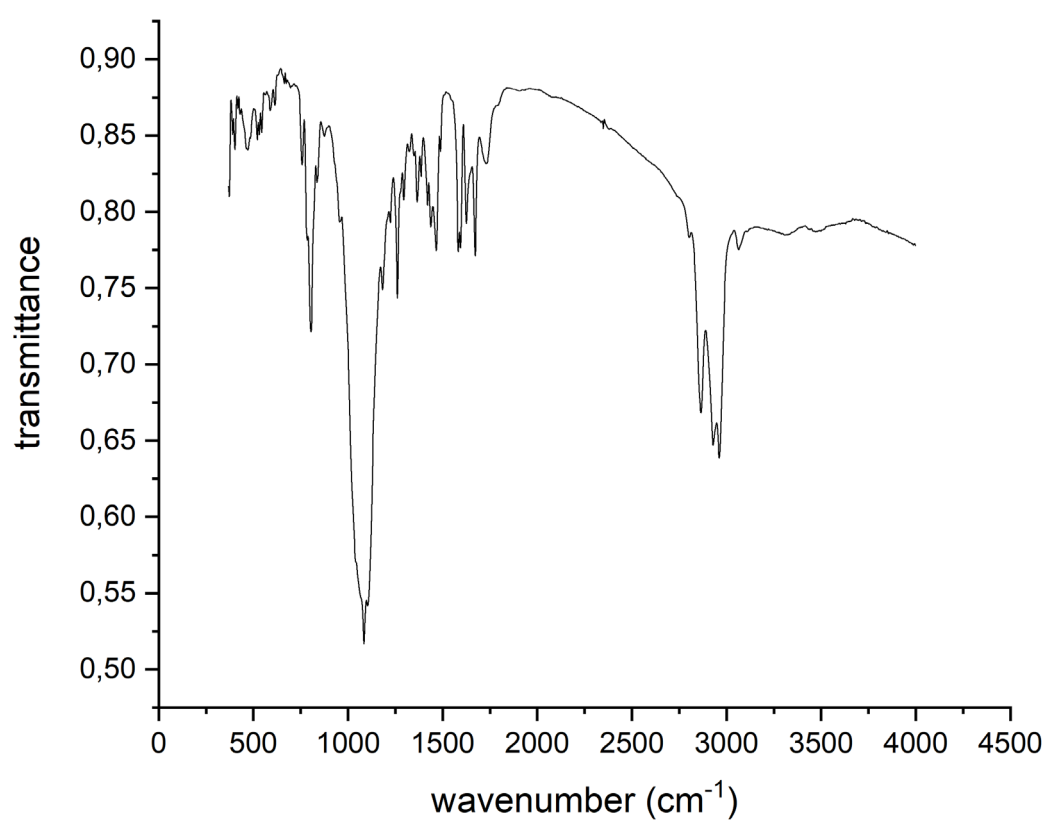

**Figure S5.** FT-IR spectrum of **2**.

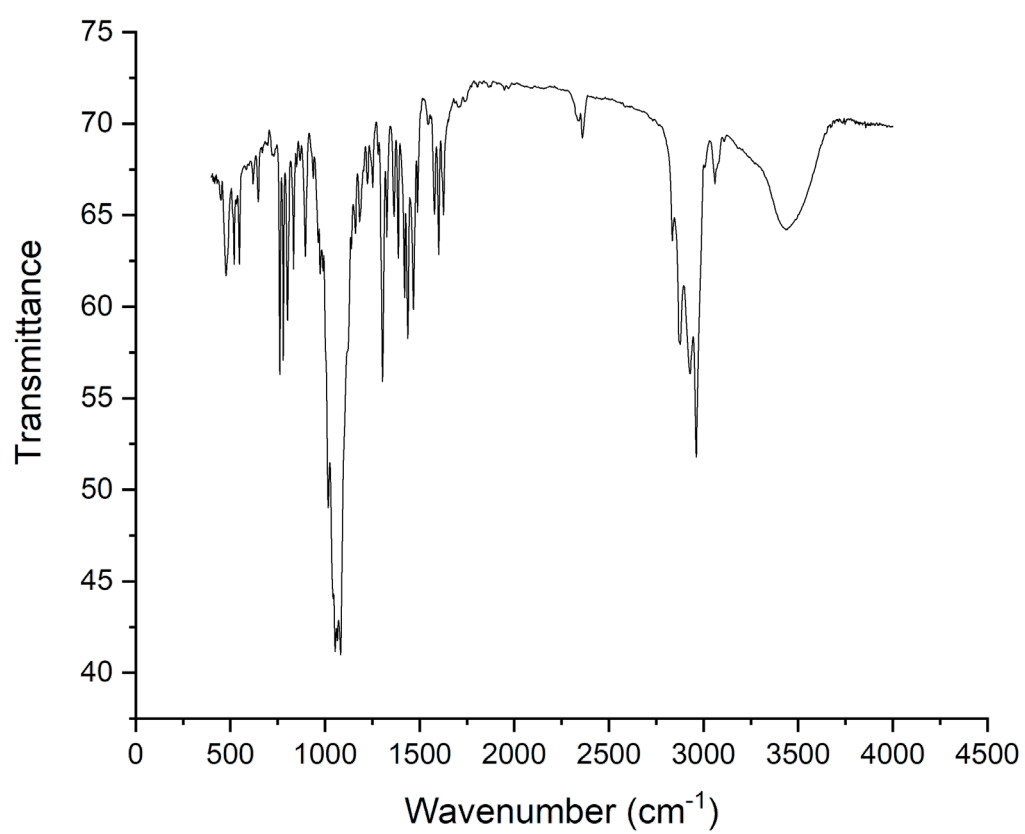

**Figure S6.** FT-IR spectrum of **3**.

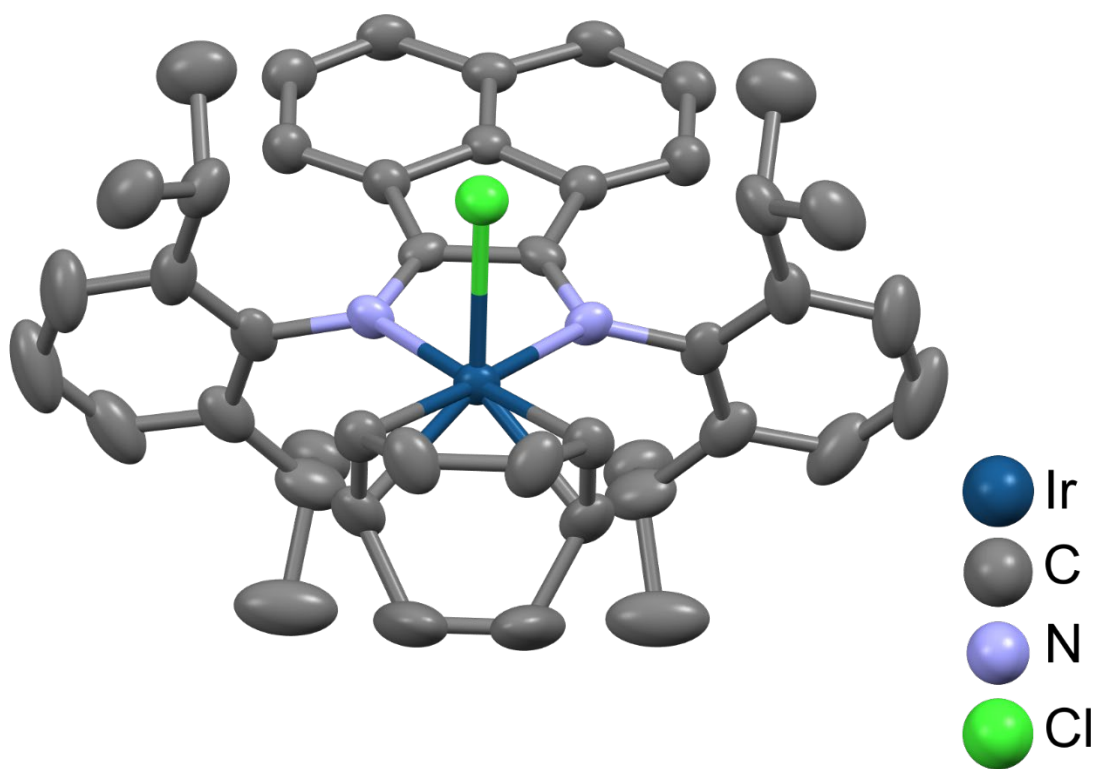

1

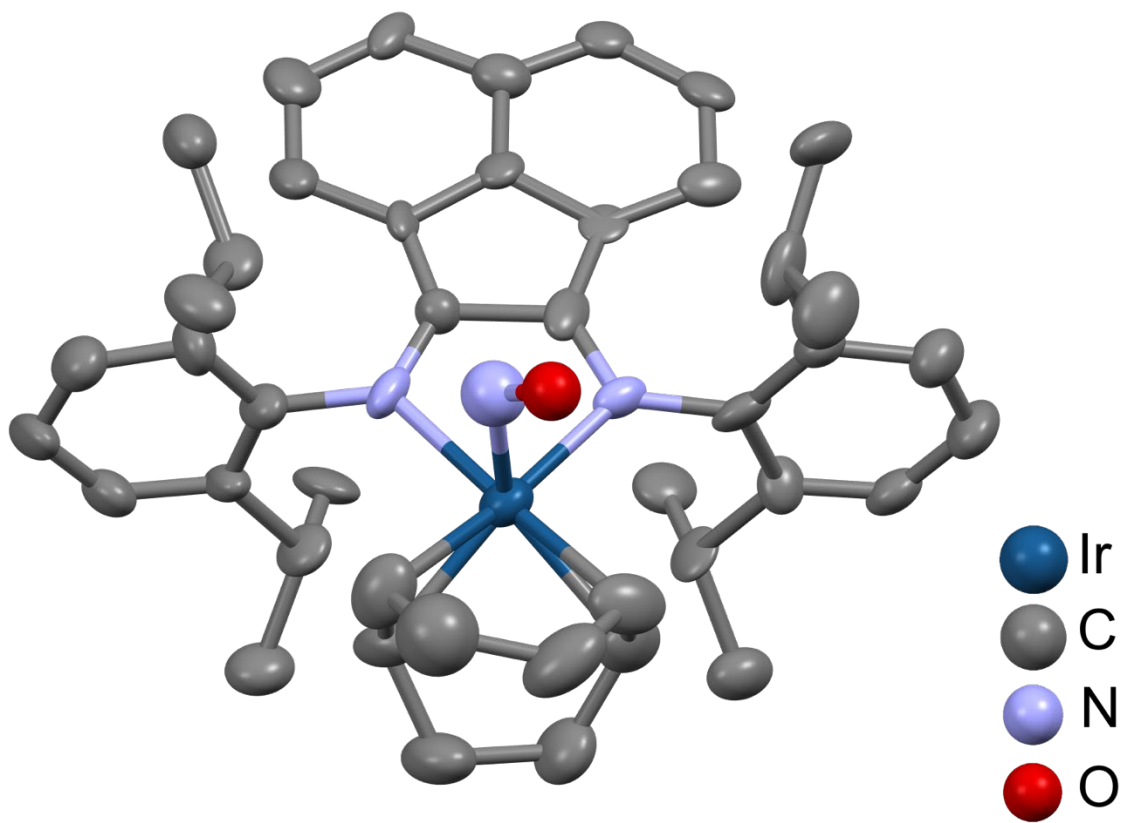

cation of 2

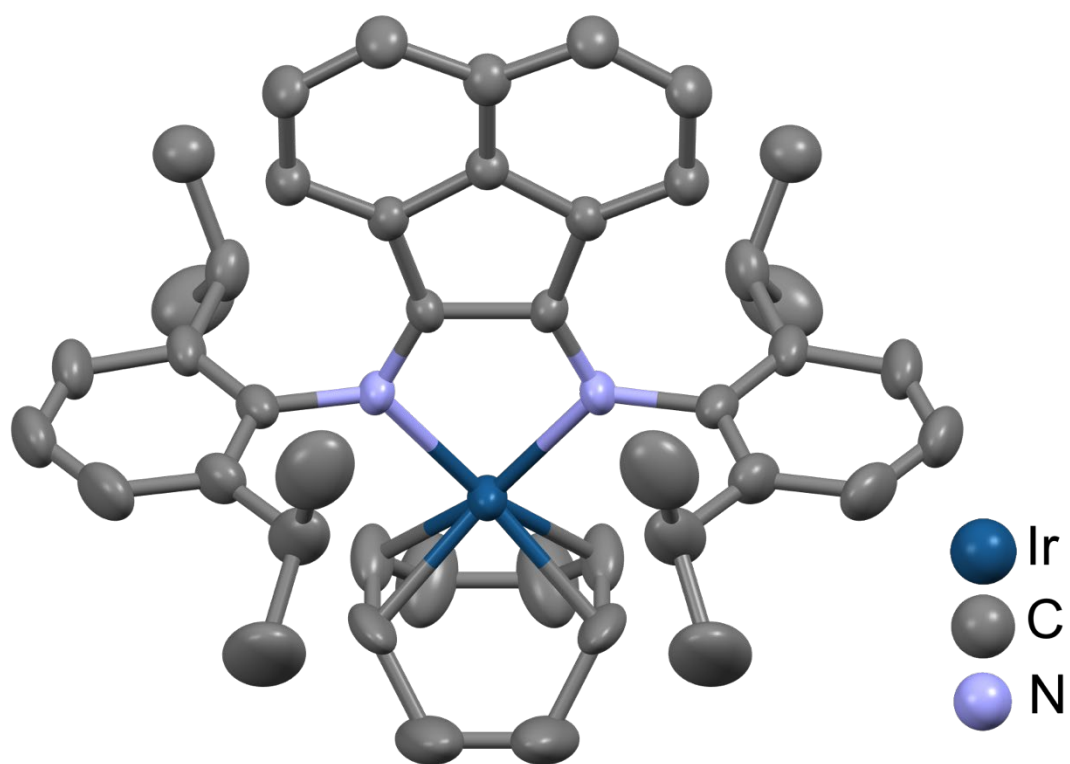

cation of **3**

**Figure S7.** ORTEP representation (50% probability ellipsoids) of **1**, cation of **2** and cation of **3**.

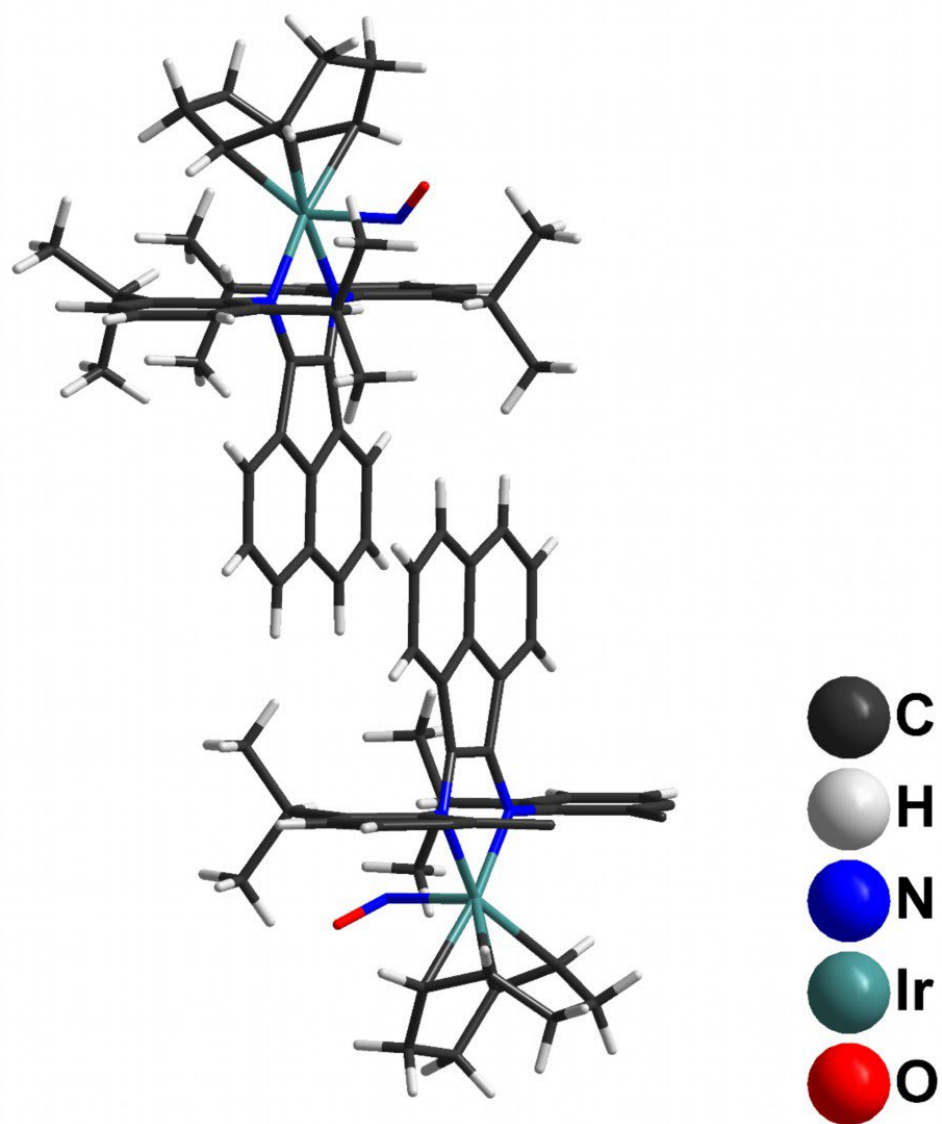

**Figure S8.**  $\pi$ - $\pi$  connected dimers in the crystal packing of **2**.



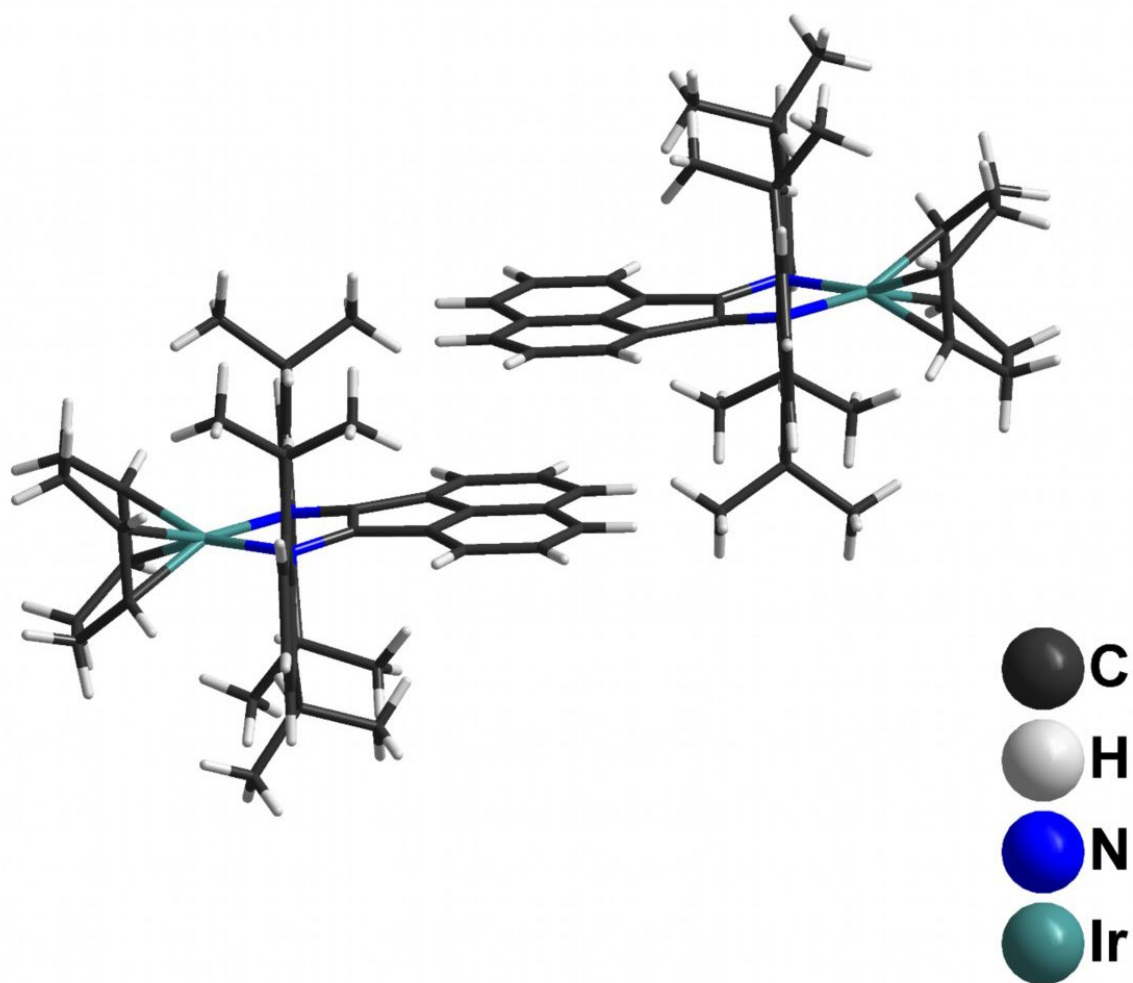

**Figure S9.**  $\pi$ - $\pi$  connected dimers in the crystal packing of **3**.

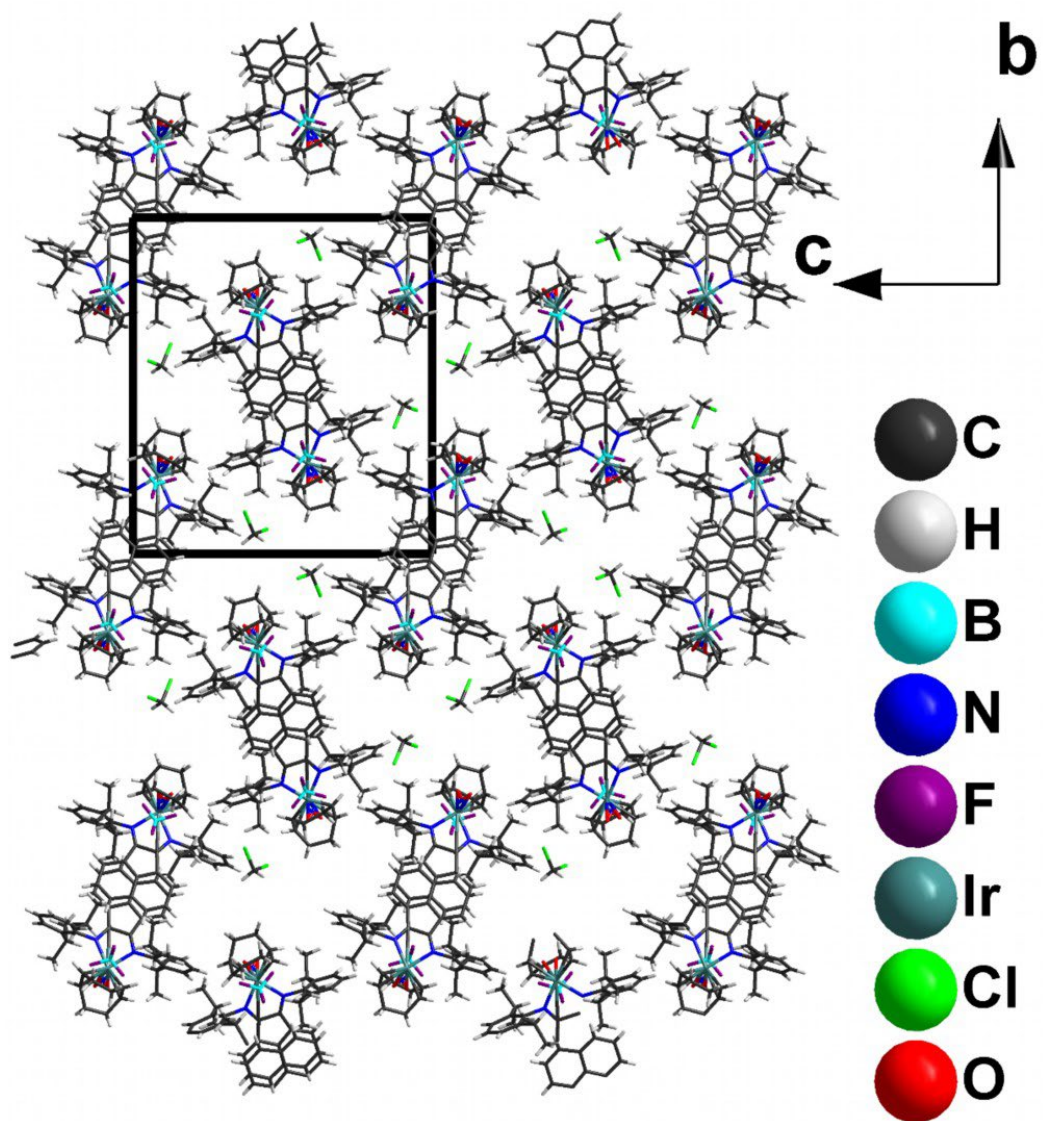

**Figure S10.** Crystal packing of 2.

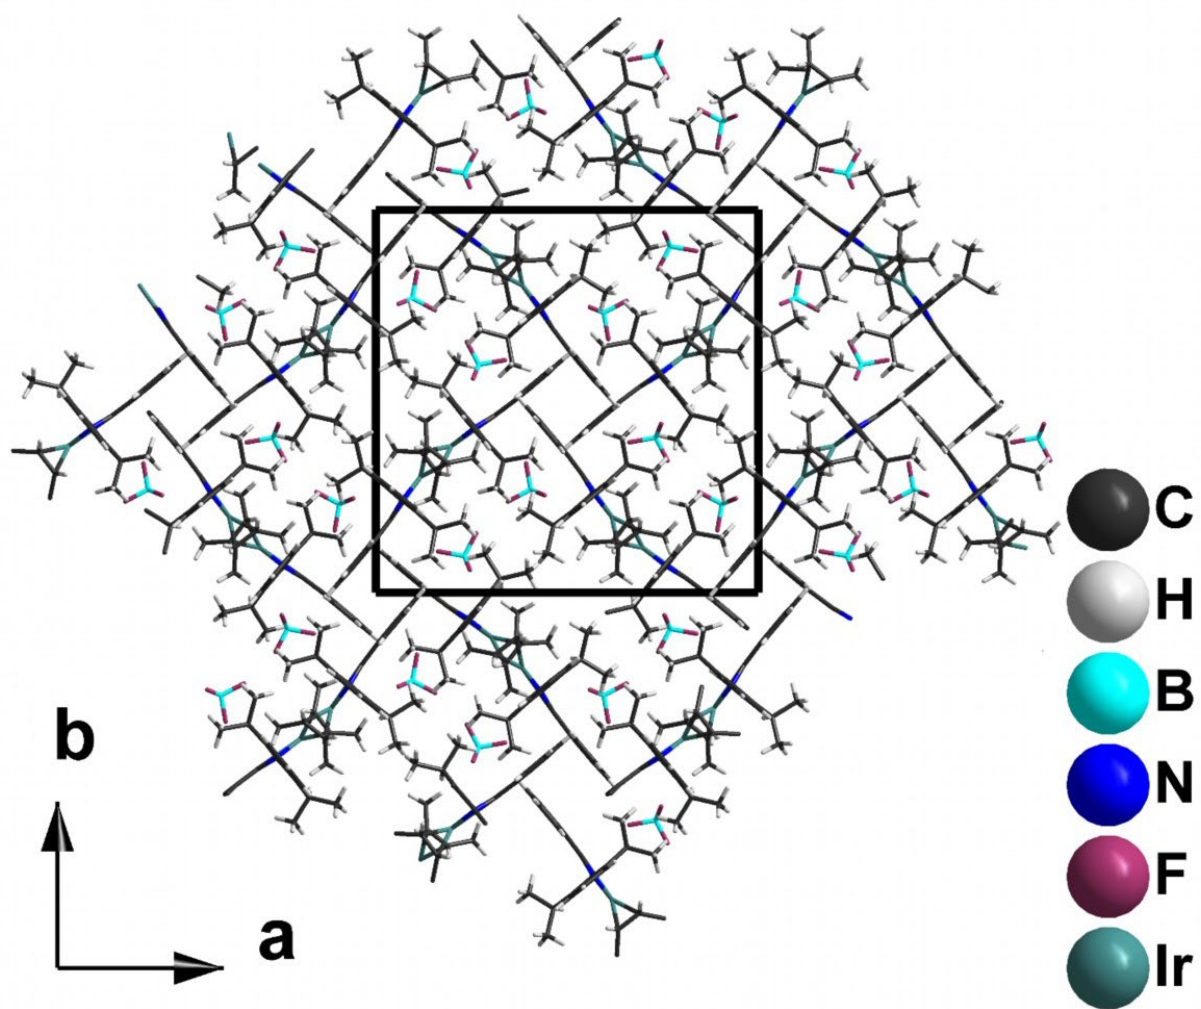

**Figure S11.** Crystal packing of **3**.

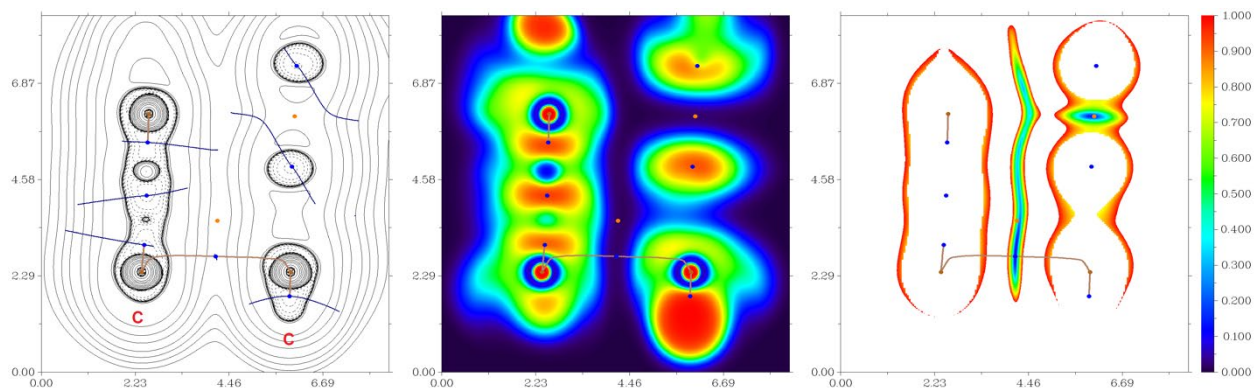

**Figure S12.** Contour line diagram of the Laplacian of electron density distribution, bond paths, and selected zero-flux surfaces (left panel), visualization of electron localization function (ELF, center panel) and reduced density gradient (RDG, right panel) analyses for selected intermolecular C...C contacts in the crystal structure **2**. Bond critical points are shown in blue, nuclear critical points – in pale brown, ring critical points – in orange, bond paths are shown as pale brown lines, length units – Å, and the color scale for the ELF and RDG maps is presented in atomic units.

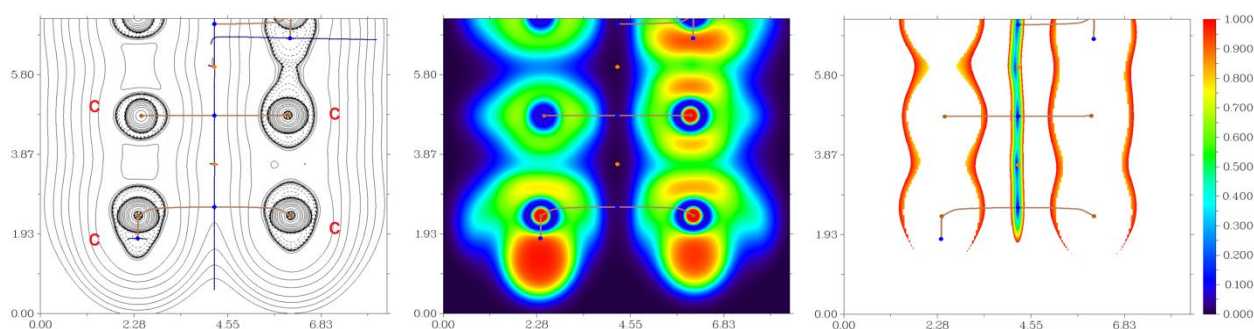

**Figure S13.** Contour line diagram of the Laplacian of electron density distribution, bond paths, and selected zero-flux surfaces (left panel), visualization of electron localization function (ELF, center panel) and reduced density gradient (RDG, right panel) analyses for selected intermolecular C...C contacts in the crystal structure **3**. Bond critical points are shown in blue, nuclear critical points – in pale brown, ring critical points – in orange, bond paths are shown as pale brown lines, length units – Å, and the color scale for the ELF and RDG maps is presented in atomic units.

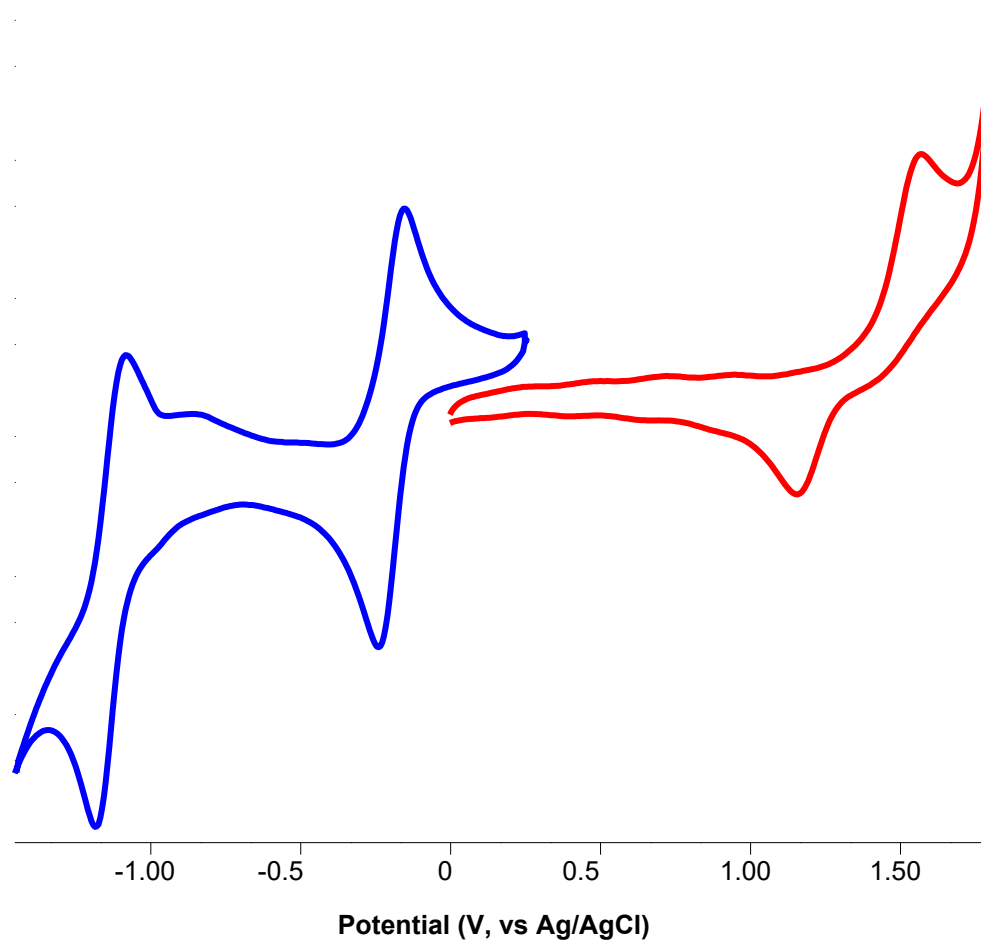

**Figure S14.** CV of **3** in  $\text{CH}_2\text{Cl}_2$  in the -1.5–1.8 V region at potential scan rate of 100 mV/s (blue spectrum – reduction part, red spectrum – oxidation part).

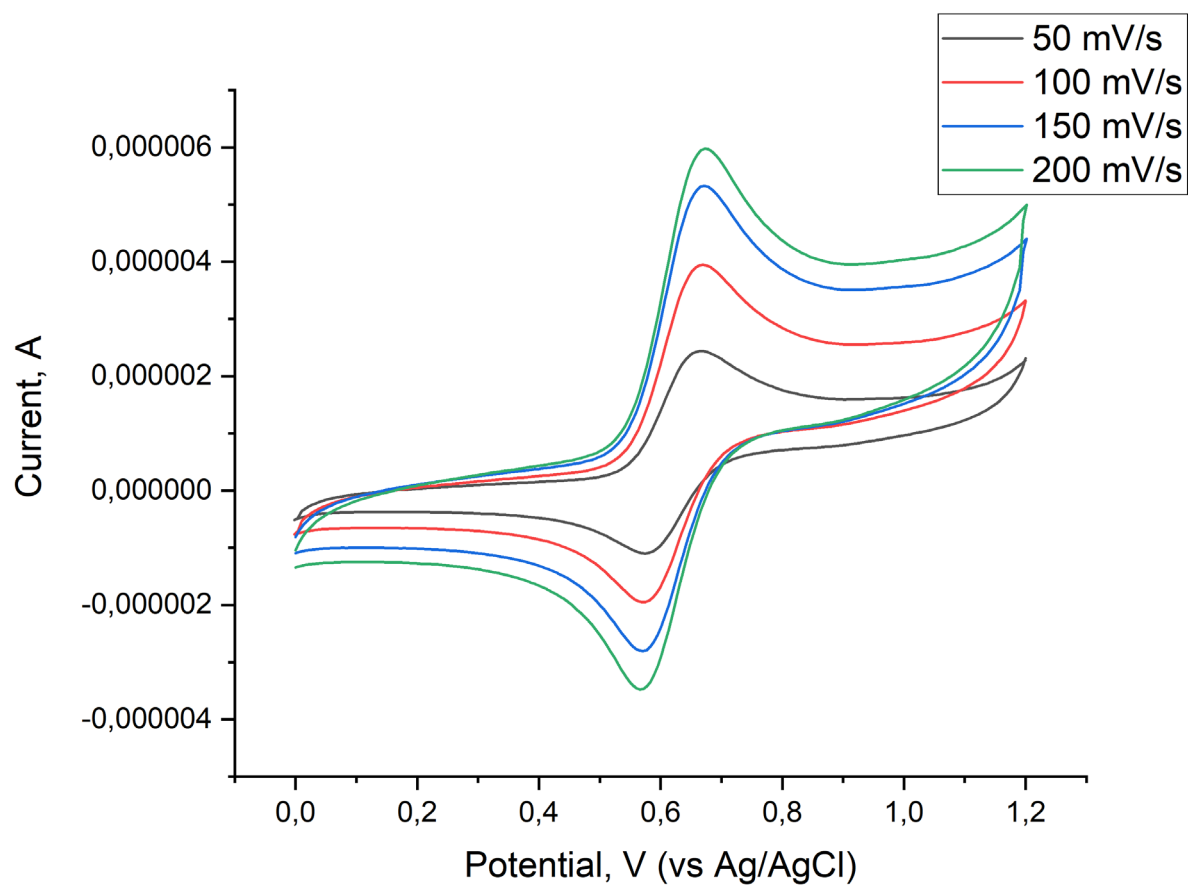

**Figure S15.** CVs of **1** in  $\text{CH}_2\text{Cl}_2$  (oxidation process), recorded at various potential scan rates (50-200 mV/s).

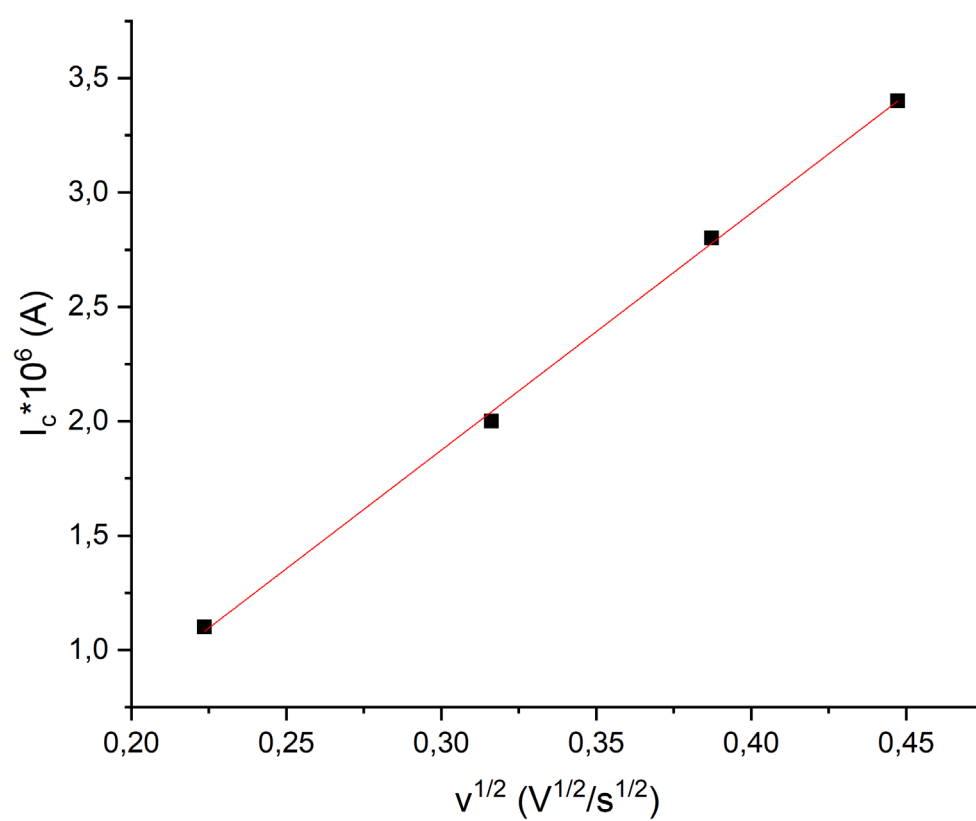

**Figure S16.** Dependence of the cathodic current on the square root of the sweep rate for the oxidation process for **1**.

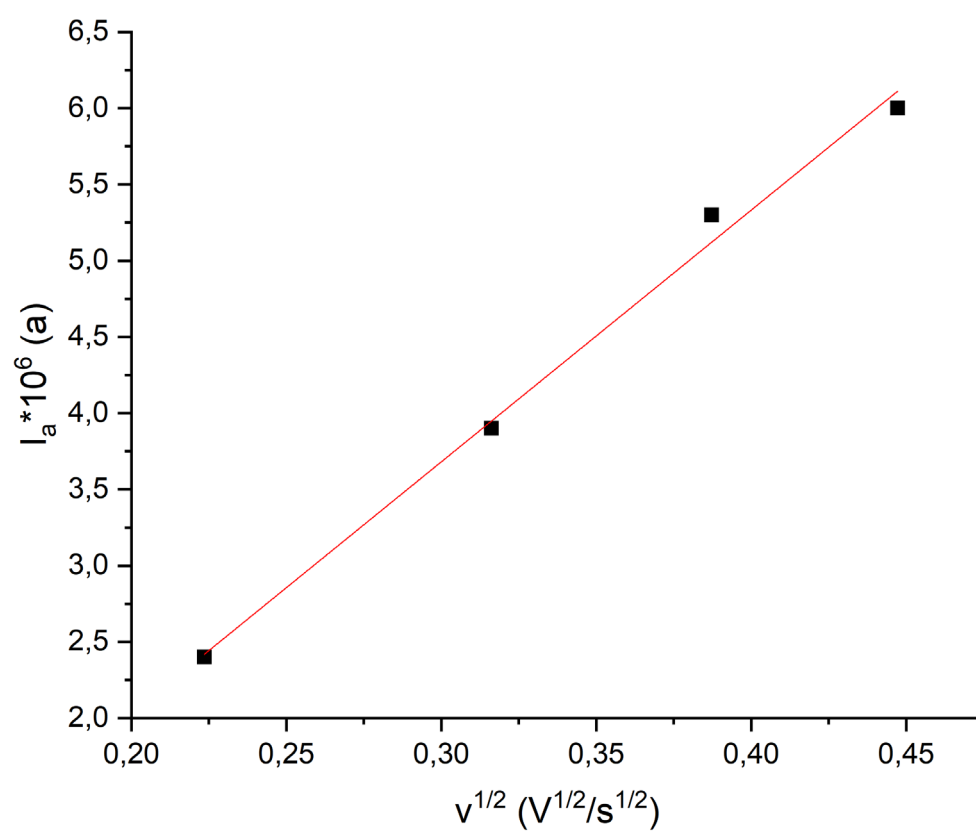

**Figure S17.** Dependence of the anodic current on the square root of the sweep rate for the oxidation process for **1**.



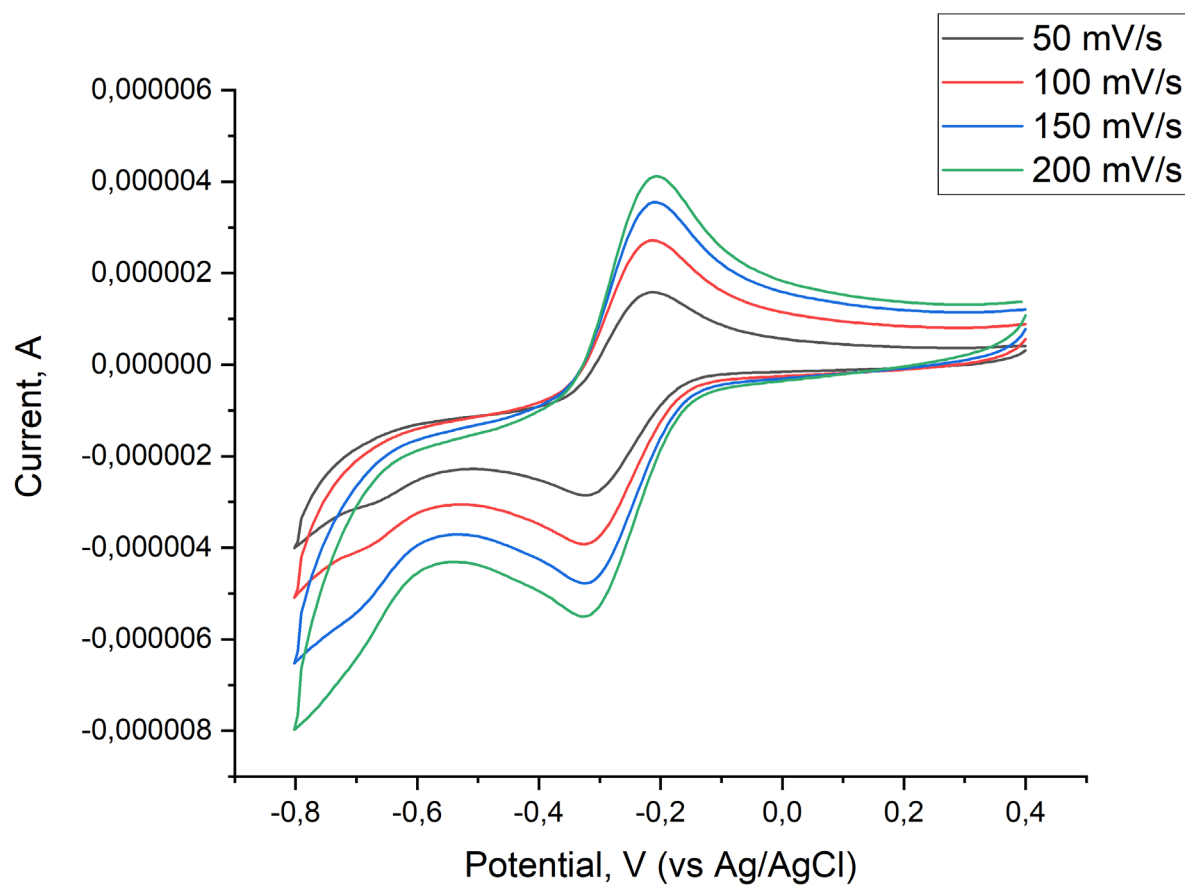

**Figure S18.** CVs of **1** in  $\text{CH}_2\text{Cl}_2$  (first reduction process), recorded at various potential scan rates (50-200 mV/s).

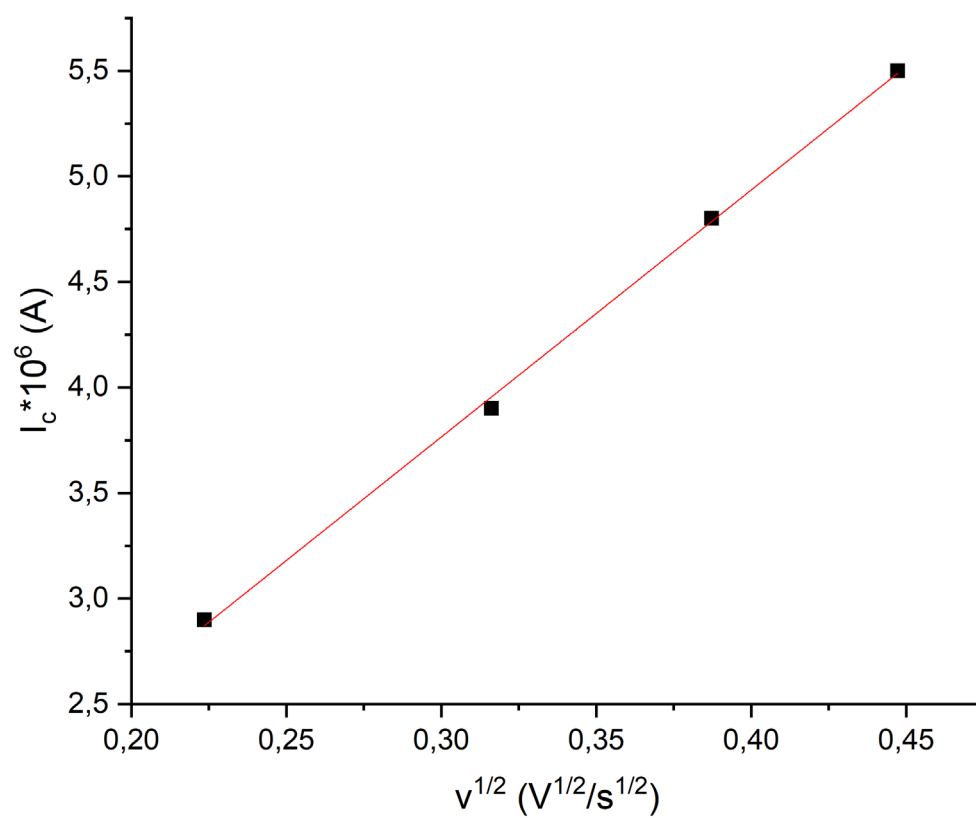

**Figure S19.** Dependence of the cathodic current on the square root of the sweep rate for the first reduction process for **1**.

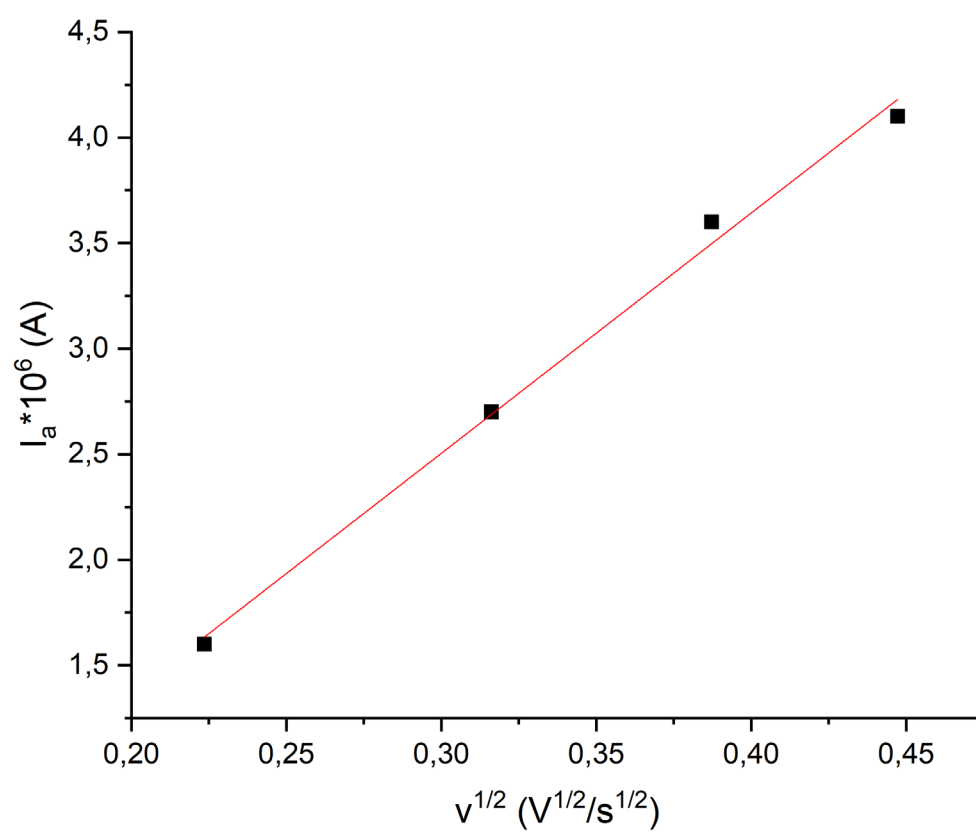

**Figure S20.** Dependence of the anodic current on the square root of the sweep rate for the first reduction process for **1**.

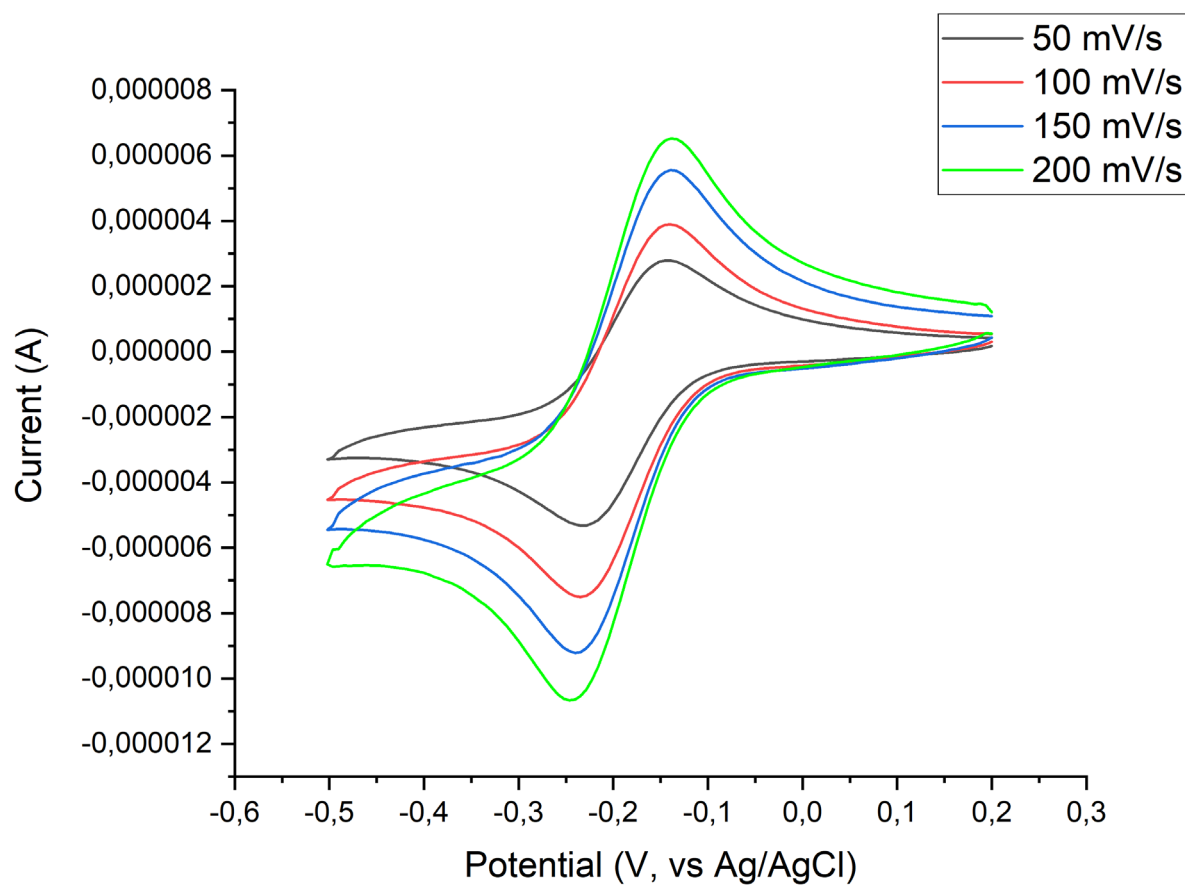

**Figure S21.** CVs of **3** in  $\text{CH}_2\text{Cl}_2$  (first reduction process), recorded at various potential scan rates (50-200 mV/s).

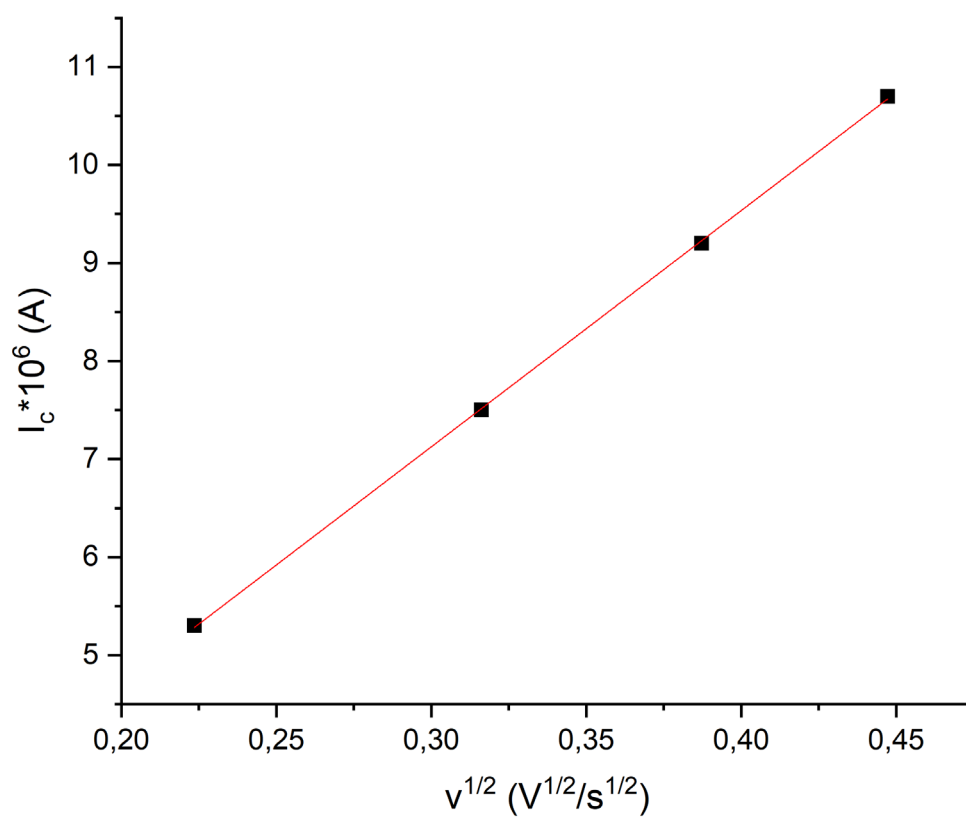

**Figure S22.** Dependence of the cathodic current on the square root of the sweep rate for the first reduction process for **3**.

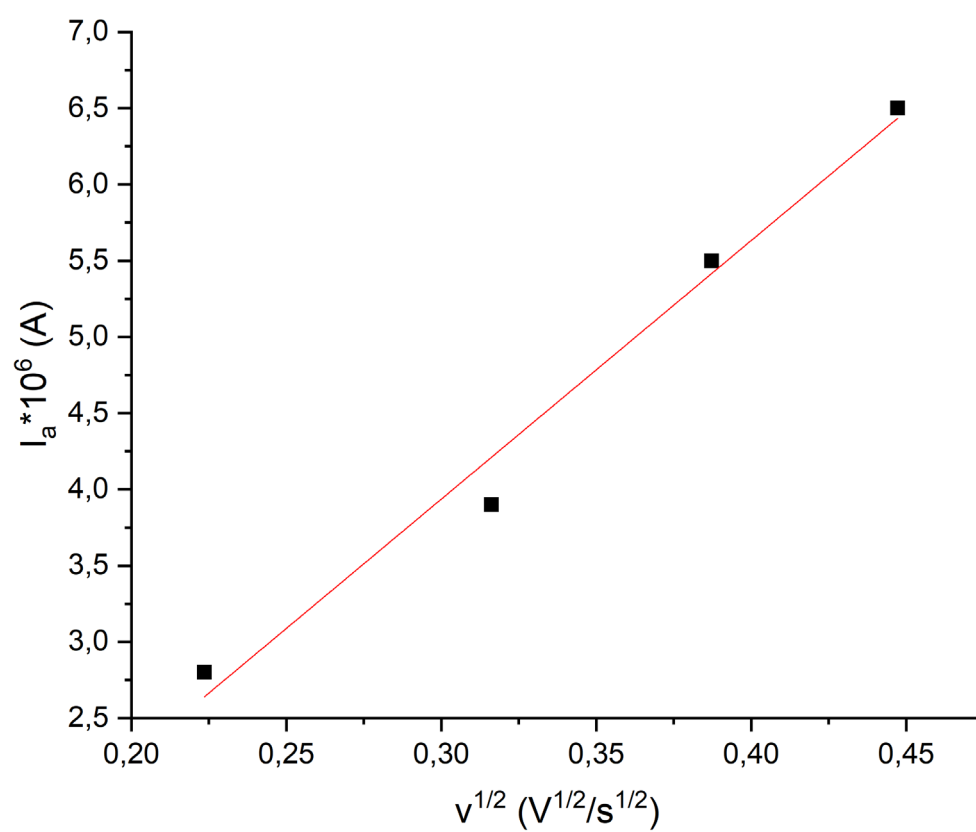

**Figure S23.** Dependence of the anodic current on the square root of the sweep rate for the first reduction process for **3**.

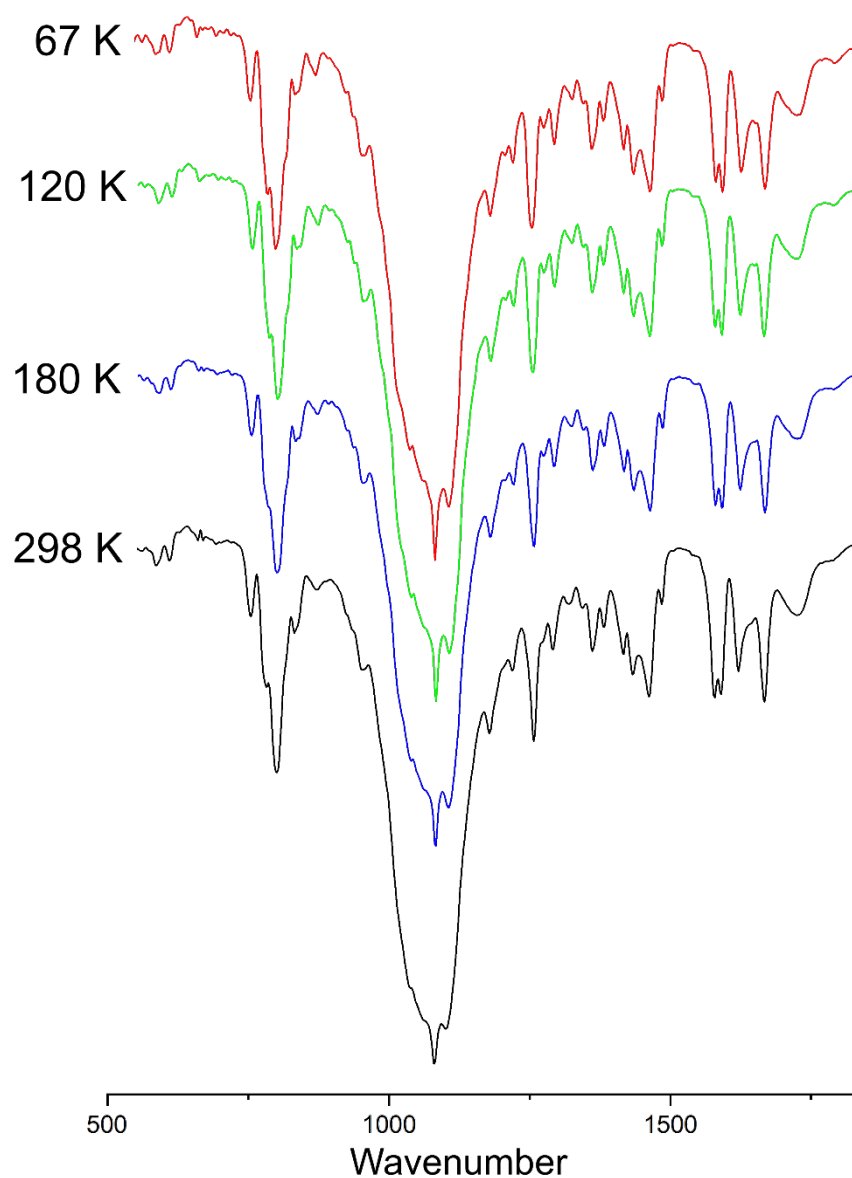

**Figure S24.** Dependence of the FT-IR spectrum of **2** on temperature.

FT-IR spectra of **2** show a broad band of vibrations of the nitroso group at  $1721\text{ cm}^{-1}$ , as well as C=N vibration bands of dpp-bian in the region of  $1672\text{--}1575\text{ cm}^{-1}$ . As the temperature decreases from 298 K to 69 K, no significant changes are observed: both the position and the intensity of all bands are preserved.

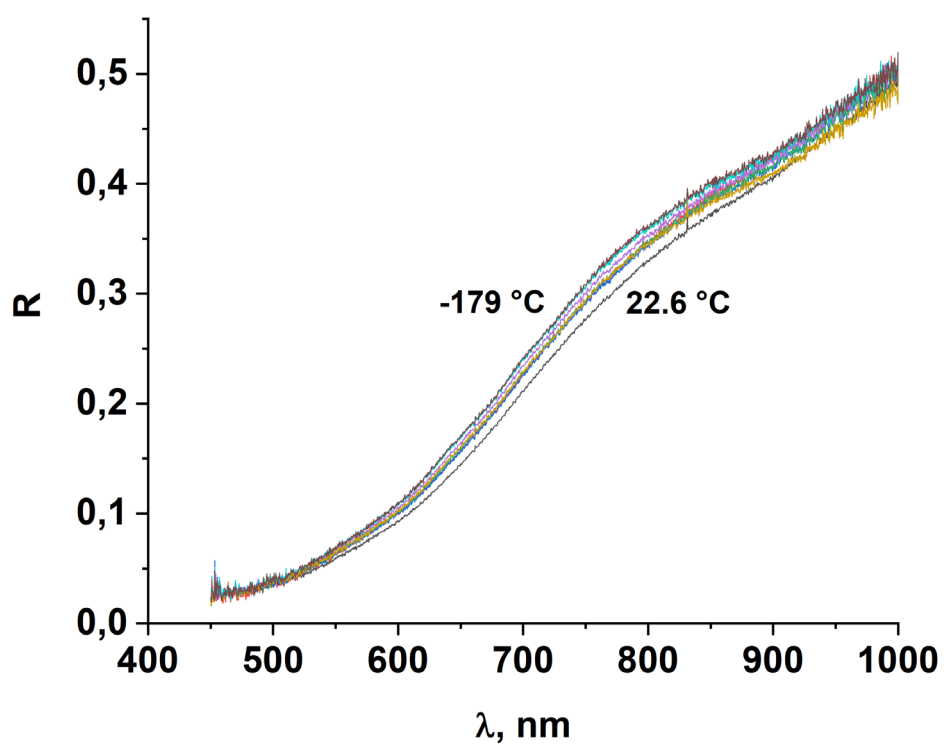

**Figure S25.** Dependence of the diffuse reflectance spectrum of **2** on temperature.

The diffuse reflectance spectra show strong absorption in the 450-550 nm region. Significant spectral changes depending on temperature are not observed. When the temperature is lowered to 67 K, a slight shift of absorption to the region of higher energies is observed, which is typical for any coordination compounds.



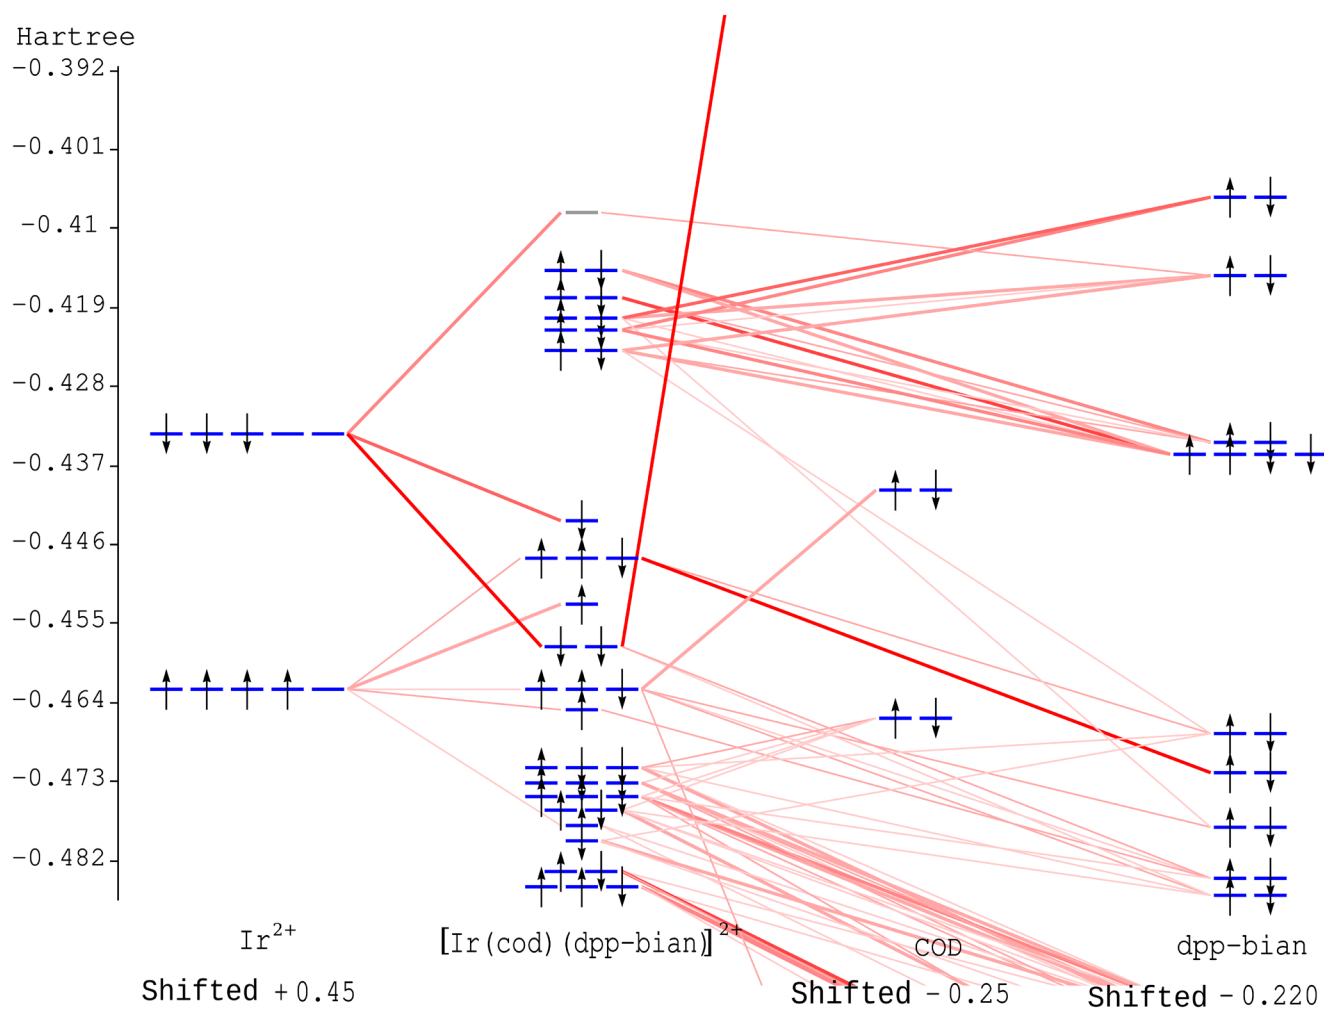

**Figure S26.** Electronic energy levels for  $[\text{Ir}(\text{cod})(\text{dpp-bian})]^{2+}$  (cation of **4**) and its fragments.

## Supplementary References

1. Romashev, N.F.; Gushchin, A.L.; Fomenko, I.S.; Abramov, P.A.; Mirzaeva, I. V.; Kompan'kov, N.B.; Kal'nyi, D.B.; Sokolov, M.N. A New Organometallic Rhodium(I) Complex with Dpp-Bian Ligand: Synthesis, Structure and Redox Behaviour. *Polyhedron* **2019**, *173*, 114110, doi:10.1016/j.poly.2019.114110.
2. Ayers, P.W.; Jenkins, S. Bond Metallicity Measures. *Comput. Theor. Chem.* **2015**, *1053*, 112–122, doi:10.1016/j.comptc.2014.10.040.
